1 Title:

2 A systematic analysis of gene-gene interaction in  
3 multiple sclerosis

4 Running title:

5 A systematic analysis of gene-gene interaction in multiple sclerosis

6 Lotfi Slim<sup>1,2,#</sup>, Clément Chatelain<sup>2</sup>, Hélène de Foucauld<sup>2</sup> & Chloé-Agathe  
7 Azencott<sup>1,3</sup>

8 <sup>1</sup>*MINES ParisTech, PSL Research University, CBIO - Centre for Computational Biology,*  
9 *F-75006 Paris, France*

10 <sup>2</sup>*SANOFI R&D, Translational Sciences, Chilly Mazarin, 91385 France*

11 <sup>3</sup>*Institut Curie, PSL Research University, INSERM, U900, F-75005 Paris, France*

12 May 28, 2020

13 **Abstract**

14 Multiple sclerosis is a complex autoimmune disease which genetic basis has been extensively  
15 investigated through genome wide association studies. So far, the conducted studies have  
16 detected a number of loci independently associated with the disease but few have investigated  
17 the interaction between distant loci, or epistasis. In the present work, we perform a gene level  
18 epistasis analysis of multiple sclerosis GWAS from the Wellcome Trust Case Control Consortium  
19 2. We systematically study the epistatic interactions between all pairs of genes within 19 multiple

---

#Contact: [lotfi.slim@mines-paristech.fr](mailto:lotfi.slim@mines-paristech.fr)

20 sclerosis disease maps from the MetaCore pathway database. We report 4 gene pairs with  
21 epistasis involving missense variants, and 117 gene pairs with epistasis mediated by eQTLs. Our  
22 epistasis analysis is able to retrieve known interactions linked to multiple sclerosis: direct binding  
23 interaction between GLI-1 and SUFU, involved in oligodendrocyte precursor cells differentiation,  
24 and regulation of IP10 transcription by NF- $\kappa$ B, thus validating the potential of epistasis analysis  
25 to reveal biological interaction with relevance in a disease specific context.

26 **Keywords**— epistasis, multiple sclerosis, gene-gene interaction, causal inference

## 27 1 Introduction

28 Extensive efforts have been deployed to tackle multiple sclerosis, a chronic disease damaging the  
29 central nervous system (Goldenberg 2012). A number of marketed drugs (Dargahi et al. 2017)  
30 attenuate the symptoms of the disease. However, an efficient drug targeting its root causes  
31 is still elusive. This is partially owed to our limited understanding of the mechanisms governing  
32 multiple sclerosis. Several studies demonstrated that heritability is a major component in multiple  
33 sclerosis (Dyment 2006; Dean et al. 2007). The development of GWAS has allowed to explore  
34 the genetic causes of this heritability. In GWAS, large cohorts of cases and controls are jointly  
35 studied in order to discover new biomarkers and causal loci. In the context of multiple sclerosis,  
36 at least fourteen studies(Sawcer, Franklin, et al. 2014) have been put in place in order to develop  
37 new hypotheses. So far, hundreds of loci (Baranzini and Oksenberg 2017; Cotsapas and Mitrovic  
38 2018) have already been statistically associated with multiple sclerosis. The biology behind some  
39 of them (Gregory et al. 2007; Jager et al. 2009; Couturier et al. 2011) has been clarified while for  
40 the majority of retained loci, it remains unexplained (Sawcer, Franklin, et al. 2014).

41 GWAS in general, and in particular, the ones related to multiple sclerosis have enjoyed limited  
42 success (Dyment et al. 2004; Cotsapas and Mitrovic 2018) partially because of the used statistical  
43 methodology. Indeed, GWAS is classically conducted as a series of univariate statistical tests  
44 of association (Bush and Moore 2012) between a single-nucleotide polymorphism (SNP) and the  
45 phenotype. Though the statistical validity of this approach is indisputable, it suffers from a  
46 lack of statistical power because of high-dimensionality and multiple hypothesis testing (Shaffer  
47 1995). It also suffers from a lack of interpretability due to the absence of a direct biological

48 explanation for the significant SNPs. In addition, single-locus analyses, by design, do not take into  
49 account interactions between distinct genes, or epistasis (Phillips 2008). At least two gene-gene  
50 interactions have been discovered in multiple sclerosis: high levels of c-Jun may cause enhanced  
51 myelinating potential in Fbxw7 (Harty et al. 2019) and DDX39B is both a potent activator of IL7R  
52 exon6 splicing and a repressor of sIL7R (Galarza-Muñoz et al. 2017). An additional tripartite  
53 genic interaction has also been reported (Lincoln et al. 2009): epistasis between HLA-DRB1,  
54 HLA-DQA1, and HLA-DQB1 loci increases multiple sclerosis susceptibility. This further cements  
55 the need to study epistasis to understand the genetic basis of multiple sclerosis.

56 We perform here a selective gene-level analysis of epistasis in multiple sclerosis. The study  
57 of epistasis at the gene-level is important because the statistical association at the SNP level  
58 might not be strong enough to establish a link between the corresponding genes and the studied  
59 disease. We systematically study interactions between pairs of genes contained in 19 multiple  
60 sclerosis disease maps from the MetaCore (Ekins et al. 2006) dataset. For this purpose, we apply  
61 epiGWAS (Slim et al. 2018) on the multiple sclerosis GWAS from the Wellcome Trust Case  
62 Control Consortium 2 (Sawcer, Hellenthal, et al. 2011). EpiGWAS was originally developed for  
63 SNP-level detection, but we extended here to the gene-level. Our analysis yielded 4 gene pairs  
64 with epistasis involving missense variants, and 117 gene pairs with epistasis mediated by eQTLs.  
65 Among them, two pairs are already known: direct binding interaction between GLI-I and SUFU,  
66 involved in oligodendrocyte precursor cells differentiation, and regulation of IP10 transcription  
67 by NF- $\kappa$ B. This confirms the capacity of the statistical study of epistasis to detect biological  
68 interactions that further our understanding of disease mechanisms.

## 69 **2 Methods**

### 70 **2.1 epiGWAS: from the SNP level to the gene level**

#### 71 **2.1.1 Detecting SNP-SNP synergies with epiGWAS**

72 In (Slim et al. 2018), we have developed epiGWAS, a new framework for targeted epistasis to detect  
73 interactions between a given SNP  $A$ , which we refer to as the target, and a set of SNPs  $X = \{X_1, \dots, X_p\}$   
74 , which can cover either the whole genome or a predetermined region e.g. a gene or a coding region.

75 The output of epiGWAS is a set of interaction scores  $\{a_1, \dots, a_p\}$  between each SNP in the set  $X =$   
76  $\{X_1, \dots, X_p\}$  and the target  $A$ . We propose a family of methods to compute the interaction scores. All  
77 interaction scores account for the relationship between the target and the rest of the genome through a  
78 propensity score  $\pi(A|X)$ . This propensity score models the linkage disequilibrium structure between  $A$   
79 and  $X$ . Taking it into account allows us to account for main effects and recover epistatic effects only.

80 If we choose a symmetric binary encoding for the target  $A \in \{-1, +1\}$ , we can always write the  
81 following decomposition for the genotype-phenotype relationship:

$$82 \quad Y = \mu(X) + \delta(X) \cdot A + \epsilon, \quad (1)$$

83 where  $\epsilon$  is a zero mean random variable and

$$84 \quad \begin{cases} \mu(X) = \frac{1}{2} [\mathbb{E}(Y|A = +1, X) + \mathbb{E}(Y|A = -1, X)] \\ \delta(X) = \frac{1}{2} [\mathbb{E}(Y|A = +1, X) - \mathbb{E}(Y|A = -1, X)] . \end{cases} \quad (2)$$

85 The first term in Eq. 2,  $\mu(X)$ , models the average effect of the target  $A$  on the expected phenotype,  
86 conditionally on  $X$ . By contrast, the second term  $\delta(X)$  models the difference of the expected outcome for  
87 the two modes of  $A \in \{-1, +1\}$ . The term  $\delta(X)$  explicits any conditional effect of  $A$  that can not be solely  
88 explained through the SNPs in  $X$ . This why we interpret the product term  $\delta(X) \cdot A$  as an interaction term  
89 between  $A$  and  $X$ .

90 For a given sample, only one of the two possibilities  $\{-1, +1\}$  is observed. This makes directly estimat-  
91 ing the term  $\delta(X)$  impossible. The purpose of epiGWAS is to introduce propensity scores to recover the  
92 term  $\delta(X)$ . More precisely, we are interested in recovering the support of  $\delta(X)$ , namely the SNPs within  
93  $X$  interacting with  $A$ .

94 We notice that by using a second binarized version of the target,  $\tilde{A} = (A + 1)/2 \in \{0, 1\}$ , we can  
95 directly derive the desired term  $\delta(X)$ :

$$\delta(X) = \frac{1}{2} \mathbb{E} \left[ Y \left( \frac{\tilde{A}}{\pi(\tilde{A} = 1|X)} - \frac{1 - \tilde{A}}{\pi(\tilde{A} = 0|X)} \right) \middle| X \right].$$

So, a first straightforward approach is to implement a penalized regression approach for the estimate of the support of  $\delta(X)$ . We refer to this approach as *modified outcome*. We use this denomination because the natural outcome  $Y$  is substituted by the modified outcome:

$$\tilde{Y} = Y \left( \tilde{A}/(\pi(\tilde{A} = 1|X)) - (1 - \tilde{A})/(\pi(\tilde{A} = 0|X)) \right).$$

96 To derive  $\tilde{Y}$ , an estimate of the propensity score  $\pi(A|X)$  is needed. The classical and straightforward  
97 approach for the estimation of  $\pi(A|X)$  is logistic regression. For genomic data, given the high dimen-  
98 sionality of  $X$ , we observed that extreme overfitting ensued. As a solution, we resorted instead to a  
99 semi-parameterized estimation method. In fastPHASE (Scheet and Stephens 2006), a hidden Markov  
100 model (HMM) is developed in order to perform imputation. The observed states correspond to SNPs and  
101 the hidden states to structural dependence states. After fitting the HMM model in a chromosome-wise  
102 fashion, we applied the forward algorithm (Rabiner 1989) to obtain the scores  $\pi(A|X)$ .

103 If the estimation error of  $\pi(A|X)$  is large or severe overfitting occurs, the use of the inverse of the  
104 estimated scores can result in numerical instability and bias the results. Several approaches have already  
105 been proposed in the literature (Lunceford and Davidian 2004) to tackle this issue.

106 Among them, we only use the *robust modified outcome* method. In a previous work (Slim et al. 2018),  
107 we have demonstrated its superior performance in comparison with other epistasis detection baselines and  
108 the other methods of the modified outcome family.

### 109 2.1.2 Gene-level epiGWAS

110 EpiGWAS can be ran in an exhaustive fashion for each target  $X_i$  against the rest of the SNPs  $\{X_1, \dots, X_{i-1}, X_{i+1}, \dots, X_p\}$ .  
111 This procedure generates a list of interaction score vectors. The interpretability and usability of such an  
112 output is limited because of the large number of interactions and the different covariates for each target  
113 which makes the comparison of the associated scores difficult. For instance, different regularization grids  
114 yield different stability curves, and thus, different areas under the curve. Furthermore, despite their ro-  
115 bustness, the biological significance of the scores is limited. A first step to improve interpretability is to use  
116 rankings. From a practical point of view, rankings are a sensible choice because only the highest-ranking  
117 SNPs are used. Rankings also improve comparability between different targets because of the similarity of  
118 scale and insensitivity to the underlying parameterization. For a target  $i$ , we denote  $r_{ij} \in \{1, \dots, p-1\}$   
119 the rank in a decreasing order of the score of SNP  $j$ .

120 Another immediate benefit of the use of rankings is the possibility of combining of different rankings.  
121 For example, for two SNPs  $i$  and  $j$ , we can define the following epistasis interaction score:

$$122 \quad \text{inter}(i, j) = \frac{1}{r_{ij} + r_{ji}}. \quad (3)$$

123 The interaction score in Eq. 3 has the advantages of symmetry and boundedness. The scores are  
124 comprised between  $]0, 1/2]$ . Additionally, the combination of two pairwise scores  $r_{ij}$  and  $r_{ji}$  can help  
125 control the estimation errors for one of the targets. For example, if two SNPs  $i$  and  $j$  are in interaction

126 and the result  $r_{ij}$  is not sufficiently high to reflect that, a good ranking of  $r_{ji}$  can help compensate that.

127 We can further aggregate the rankings to detect interactions between genes. More generally, the  
128 rankings can be combined to detect interactions between any disjoint sets of SNPs *e.g.* biological pathways,  
129 regulatory regions, etc. Let  $p'$  be the total number of genes and  $\{G_1, \dots, G_{p'}\}$  the corresponding sets of  
130 SNPs such that  $\bigcup_{i=1}^{p'} G_i = [1..p]$ . The easiest way to devise an interaction score between two genes  $i'$  and  $j'$   
131 is to compute the average of all pairwise scores:

$$132 \quad \text{inter}(G_{i'}, G_{j'}) = \frac{1}{|G_{i'}||G_{j'}|} \sum_{i \in G_{i'}} \sum_{j \in G_{j'}} \frac{1}{r_{ij} + r_{ji}}. \quad (4)$$

133 Thanks to the symmetry of SNP-SNP scores in Eq. 3, the gene-gene scores in Eq. 4 are symmetric,  
134 too. Moreover, the averaging reduces the impact of the size of the genes. In addition to the mean, we can  
135 also use the median or the minimum/maximum of all pairwise scores. However, only a single value will  
136 be taken into account with the latter strategies. Depending on the implemented regression method, with  
137 respect to a target  $i$ , the scores, and hence the rankings, of two nearby variants  $j$  and  $j'$  can be similar  
138 because of linkage disequilibrium. This can make the gene-gene scores more robust through the averaging  
139 of high nearby rankings. On the other hand, the averaging strategy can be biased by the marginal effects  
140 of some *loci* inflating by consequence the interaction scores.

## 141 2.2 Data and experiments

142 In this section, we describe the data we integrate to perform our systematic gene-gene interaction analysis  
143 for MS. For genotypic data, we select the MS dataset from the second release of the Wellcome Trust Case  
144 Control Consortium (WTCCC2) et al. (Sawcer, Hellenthal, et al. 2011). In order to improve statistical  
145 power and the downstream biological interpretation, we subset the marker SNPs related to the genes  
146 referenced in the MetaCore (Ekins et al. 2006) disease maps for multiple sclerosis. Each gene pair within  
147 a disease map is tested for interaction. Within the same disease map, the included genes affect the same  
148 MS-related mechanism. Therefore we can use this prior knowledge to evaluate if our method can retrieve  
149 known interactions and identify new ones. The SNPs can be mapped to the genes in two different ways:

- 150 • Physical mapping: we select all the marker SNPs which positions are within the boundaries of a  
151 gene. In this case, we take into account SNPs with an effect on the structure and function of the  
152 corresponding protein.
- 153 • eQTL-SNP mapping: with the selection of eQTL SNPs, we study epistasis through the variation in  
154 expression of the associated genes.

## 155 2.3 Genotypic data

156 The WTCCC2 study includes 9 772 MS cases and 17 376 controls hailing from 15 different countries. The  
157 presence of population structure, confirmed by a genomic inflation factor (GIF) of 3.72, is poised to lead  
158 to inference issues. To avoid this problem, we only use Caucasian British samples in both cases and  
159 controls. The resulting dataset consists of 2048 cases and 5733 controls with a GIF of 1.06 which proves  
160 the homogeneity of the dataset. The selected controls come from two distinct cohorts from the UK Blood  
161 Services (NBS) and the 1958 British Birth Cohort (58C). The careful reader may notice the important  
162 imbalance between the total number of cases and controls which may distort the results. To equalize the  
163 field, we randomly subsample controls to obtain a number of controls equal to the number of cases. We  
164 also note that we discarded the samples singled out for quality control by the WTCCC.

### 165 2.3.1 Variant selection

**Table 1.** Titles and internal IDs of MetaCore disease maps related to MS.

| internal ID | Title                                                                                                |
|-------------|------------------------------------------------------------------------------------------------------|
| 3302        | Notch signaling in oligodendrocyte precursor cell differentiation in multiple sclerosis              |
| 3305        | SHH signaling in oligodendrocyte precursor cells differentiation in multiple sclerosis               |
| 3306        | Inhibition of oligodendrocyte precursor cells differentiation by Wnt signaling in multiple sclerosis |
| 4455        | Inhibition of remyelination in multiple sclerosis: regulation of cytoskeleton proteins               |
| 4593        | Axonal degeneration in multiple sclerosis                                                            |
| 4693        | Role of Thyroid hormone in regulation of oligodendrocyte differentiation in multiple sclerosis       |
| 4703        | Demyelination in multiple sclerosis                                                                  |
| 4791        | Role of CNTF and LIF in regulation of oligodendrocyte development in multiple sclerosis              |
| 4794        | Retinoic acid regulation of oligodendrocyte differentiation in multiple sclerosis                    |
| 4843        | Growth factors in regulation of oligodendrocyte precursor cells proliferation in multiple sclerosis  |
| 4846        | Growth factors in regulation of oligodendrocyte precursor cells survival in multiple sclerosis       |
| 4901        | Inhibition of remyelination in multiple sclerosis: role of cell-cell and ECM-cell interactions       |
| 5199        | Cooperative action of IFN- $\gamma$ and TNF- $\alpha$ on astrocytes in multiple sclerosis            |
| 5288        | Impaired inhibition of Th17 cell differentiation by IFN- $\beta$ in multiple sclerosis               |
| 5378        | Role of IFN- $\beta$ in the improvement of blood-brain barrier integrity in multiple sclerosis       |
| 5398        | Role of IFN- $\beta$ in activation of T cell apoptosis in multiple sclerosis                         |
| 5518        | Role of IFN- $\beta$ in inhibition of Th1 cell differentiation in multiple sclerosis                 |
| 5601        | IL-2 as a growth factor for T cells in multiple sclerosis                                            |
| 5611        | Role of IL-2 in the enhancement of NK cell cytotoxicity in multiple sclerosis                        |

166 We give in Table 1 the full list of MS disease maps. For ease of reproducibility, we also give the internal  
167 ID of the disease maps, as indicated in MetaCore. The number of genes within each map greatly varies.  
168 It ranges from 13 genes for disease map (DM3305) to 100 genes (DM4593). Even for the larger maps, the  
169 total number of genes is still low enough to perform exhaustive pairwise analysis for all SNPs mapped to

170 the selected genes. Similarly for sample-wise QC, we first discarded all low quality SNPs designated by  
171 the WTCCC2. We then selected SNPs according to the following mappings:

- 172 • Physical mapping: corresponds to retrieving all marker SNPs located on a given gene. We use the  
173 accompanying R package metabaser (Ishkin 2019) to first define the boundaries of a given gene, and  
174 then subset all SNPs according to their positions, as referenced in dbSNP version 144 (Pagès 2017).
- 175 • eQTL mapping: we use the cis-eQTL dataset from the eQTLGen consortium (Võsa et al. 2018),  
176 which provides for each gene a list of significant eQTL-SNPs. The dataset combines 31 684 whole  
177 blood samples from 37 cohorts.

178 For our present study, we chose cis-eQTLs instead of trans-eQTLs because of their higher degree of  
179 association to gene expression. The higher association can be attributed to the proximity of the SNPs to  
180 the genes: cis-eQTL are located within 1 Mb window from a gene and they often closely map to either  
181 the transcription start site or the transcription end site of a gene. The application of a false discovery  
182 rate (FDR) of 0.05 resulted in the identification of eQTL-SNPs for 16 989 genes, or approximately 88.3%  
183 of all autosomal genes expressed in blood and tested in the cis-eQTL analysis. We restricted ourselves to  
184 the genes present in the metaCore disease maps. We observed that the obtained eQTL-mapping datasets  
185 were larger than the physical mapping datasets in terms of number of SNPs: the median number of SNPs  
186 per disease map is 392 for the physical mapping analysis and 999 for the eQTL-mapping analysis. In  
187 Appendix A, we give the exact number of SNPs per disease map for each type of mapping. We also  
188 included the average number of SNPs per gene for each disease map and for both mappings.

189 Even though the two analyses are unrelated and use different sets of SNPs, some concordance for the  
190 top-scoring genes is to be expected. In fact, for the eQTLGen consortium, (Võsa et al. 2018) show that out  
191 of 15 317 trait-associated SNPs, 15.2% were in high LD with the lead eQTL SNP showing the strongest  
192 association for a cis-eQTL gene. Although the mentioned association is far from perfect, it demonstrates  
193 the often-overlooked link between the two analyses.

### 194 3 Results

195 We exhaustively apply our gene-gene interaction scores in Eq. 4 to obtain  $p'(p' - 1)/2$  interaction scores  
196 per disease map, where  $p'$  is the number of genes. Given the size of the maps (see Appendix A), the  
197 interpretation of the full results is rather difficult. We instead focused on the 2% top-scoring pairs for the  
198 two analyses. The 2% threshold was manually set with respect to the obtained result. We remarked that  
199 the top-scoring edges often constituted connected sub-components. We also remarked that the obtained



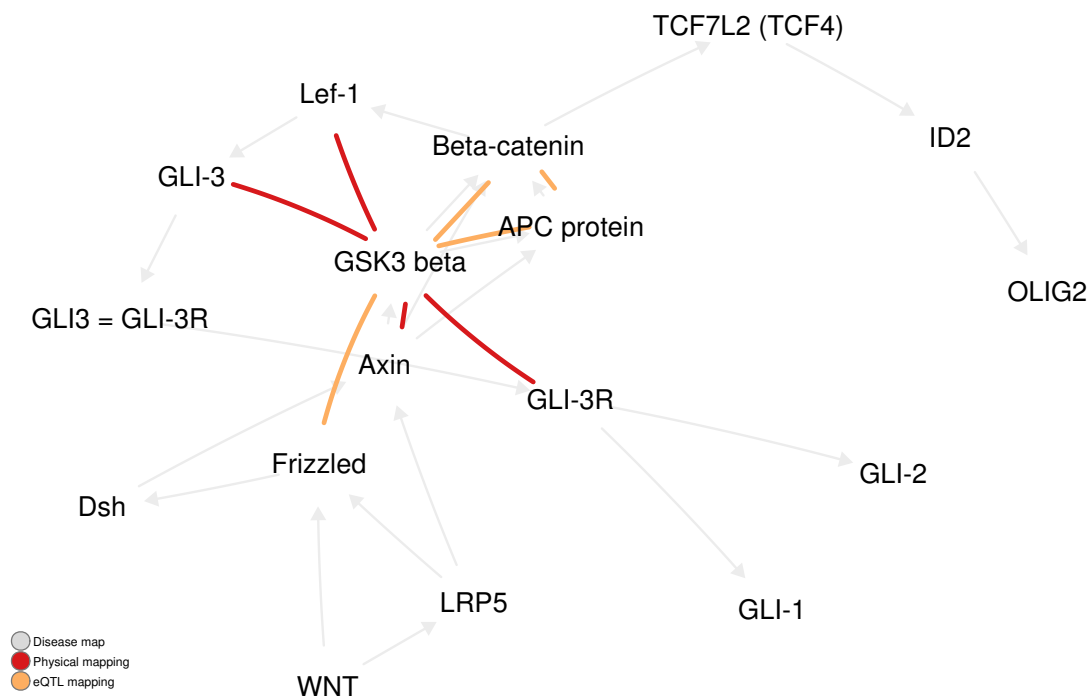

**Figure 1.** The 2% top-scoring pairs in DM 3306 for eQTL and physical mappings.

200 sub-components for the eQTL and physical mappings are often interlinked. These two remarks are more  
 201 commented in the following paragraphs. We give an illustration of the results in Figure 1 in which we plot  
 202 the obtained subnetworks in addition to the original edges for DM 3306. We relegate the results of the  
 203 other disease maps to Appendix B.

204 We notice a general consistency of the results between the different disease maps, which can be for-  
 205 mulated through the characteristics below. We also conduct an enrichment analysis, from which we derive  
 206 empirical  $p$ -values to measure the statistical significance of the observed characteristics (see Appendix C  
 207 for the full results).

- 208 • Connectedness: the obtention of connected components for both mappings is the most important  
 209 aspect of the results. With the exception of DM 3305, 3306 and 4794 consisting of 1 or 2 edges, all  
 210 disease maps have a  $p$ -value lower than 0.05. Of particular interest are large components because  
 211 of their significance. In many cases, we obtained an empirical  $p$ -value of 0 despite using  $10^4$  simula-  
 212 tions. The discovery of these novel subnetworks can help the understanding of multiple sclerosis by  
 213 unraveling new disease mechanisms.

- 214 • Complementarity: with the exception of disease map 4593, the subnetworks of the two mappings  
215 are connected *i.e.* they share at least one common node. In fact, they are often connected through  
216 multiple nodes without a significant overlap between the edges of the two networks. For instance,  
217 they share 5 vertices in DM 4901. In Appendix C, we quantify the significance of having 1, 2 or 3  
218 genes in common. We particularly note that 3 edges are in common in DM 3302 for a  $p$ -value of 0.038.  
219 Therefore, the two types of mappings recover distinct, though connected, interactions, which suggests  
220 the complementarity of the two mappings. We can then consider the union of the two subnetworks  
221 for further study.
- 222 • Centrality: we observed a high degree of connectivity for certain nodes. For example, we mention  
223 FAK in DM 4901 ( $p_{\text{FAK}} = 0$ ), SHP-2 in DM 4843 ( $p_{\text{SHP-2}} = 0.014$ ) and TRADD in DM 4843  
224 ( $p_{\text{TRADD}} = 0.052$ ). We attribute this centrality to the existence of important marginal effects that  
225 were not completely filtered out. Interestingly, the role of these genes in MS has already been  
226 established (Sun et al. 2010; Ahrendsen et al. 2017; Reuss et al. 2014).
- 227 • Commonality: despite using the top 2% of all  $p'(p' - 1)/2$  possible edges for each disease map, some  
228 of the retained edges were already present in the original disease maps. In at least 9 out of 19 disease  
229 maps, a single edge already exists in the original disease map, and in at least four of them two  
230 edges. In DM 3306, we even recover three edges ( $p = 0.099$ ). Nonetheless, drawing conclusions about  
231 the underlying biology is challenging given the potential mismatch between biological epistasis and  
232 statistical epistasis (Moore and SM Williams 2005).

### 233 3.1 Enrichment analysis for obtained subnetworks

234 Beyond the validation with existing edges, the main goal of the systematic analysis we conduct here is to  
235 discover novel gene-gene interactions in multiple sclerosis. Their biological validation requires laboratory  
236 experiments to confirm the observed statistical synergy. As we do not have access to such facilities, we use  
237 the enrichment of the recovered networks in terms of existing therapeutic targets as a validation metric.  
238 The chosen metric can be criticized in two ways: it is biased in the sense that therapeutic targets only  
239 reflect our current understanding of the disease and the existence of effective molecules for the targets. In  
240 addition, the targets were often selected on an univariate basis, while the subject of the current study are  
241 epistatic interactions. However, an enrichment analysis in terms of therapeutic targets has the advantages  
242 of being a trustworthy background thanks to the proven effect of the included genes and its relevance in  
243 terms of development of future therapies. For instance, combination therapies if an existing therapeutic  
244 target is shown to be interacting with another gene within the recovered subnetworks. Moreover, in light

245 of the new FDA guidance for the co-development of two or more drugs <sup>I</sup>, our study pipeline can be of  
246 special interest because of its focus on synergistic effects instead of separate additive effects.

247 In our case, we use OpenTargets (Carvalho-Silva et al. 2018a) as a dataset for therapeutic targets.  
248 The dataset is a collaborative effort to create an up-to-date and comprehensive repository to link genomic  
249 information of drug targets to a disease of interest. The enrichment analysis studies the overpresence of  
250 OpenTargets targets in the obtained networks in comparison with the original disease maps. We use for  
251 this matter a classical hypergeometric test (Rivals et al. 2006) to determine the statistical significance of  
252 their overpresence. We give the resulting  $p$ -values in Appendix D. For twelve disease maps, we found at  
253 least one common gene between our subnetworks and OpenTargets. Given a significance threshold of 0.05,  
254 we found two significant disease maps DM 4593 and DM 5378 with respective  $p$ -values of 0.008 and 0.02.  
255 The enriched subnetworks require further investigation, especially to study the links within the known  
256 targets and between the known targets and the rest of the subnetwork.

## 257 3.2 Directionality of the synergy

258 As shown before, our gene-level pipeline with epiGWAS robustly detects the presence of epistatic synergies  
259 between two genes. However, the obtained interaction scores do not allow to determine the directionality  
260 of the synergy. The synergy can be either positive or negative by respectively increasing or decreasing the  
261 disease risk probability. We can nonetheless get a partial answer by studying the nature of interaction  
262 between the top-scoring SNPs for each gene pair. We only selected the top-scoring pair because of its  
263 disproportionate impact on the corresponding gene-gene score. For example, we can consider the extreme  
264 case where for a pair of SNPs  $(i, j)$ , we have  $r_{ij} = r_{ji} = 1$ . The next possible best scoring pair is  
265  $r_{i'j'} = r_{j'i'} = 2$  and it further decreases in a hyperbolic manner for the lower rank pairs. So, in the best  
266 cases, the top pair will be at least twice as important as the following one.

267 The direction of the synergy between two uni-dimensional variables can be studied in various ways (Van-  
268 derWeele and Knol 2014). In particular, for a binary outcome  $Y$  and two variables  $X_1$  and  $X_2$ , we  
269 can study the sign of the interaction coefficient  $\alpha_{12}$  in the following logistic model:  $\text{logit } P(Y|X_1, X_2) =$   
270  $\alpha_0 + \alpha_1 X_1 + \alpha_2 X_2 + \alpha_{12} X_1 X_2$ . Logistic models are widely used for the study of epistasis. For the physical  
271 mapping strategy, we conduct a similar analysis. As for the eQTL mapping strategy, the methodology we  
272 use for physical mapping can be refined to amount to the desired gene-level interactions. The effect of a  
273 SNP  $i$  on the expression level  $e_i$  of the corresponding gene  $G_i$  can be examined through a model of the

---

<sup>I</sup>available for download from <https://www.fda.gov/media/80100/download>

274 form  $e_i = \gamma_i + \beta_i X_i$ . The directionality of the synergy can be deduced from the sign of the following ratio:

$$275 \quad \text{dir}(G_1, G_2) = \text{sign} \frac{\alpha_{12}}{\beta_1 \cdot \beta_2} \quad (5)$$

276 To get a better grasp of the meaning of the score in Eq. 5, it suffices to replace the two linear expression  
277 models directly in the interaction logistic model. Precisely, we obtain:

$$278 \quad \begin{aligned} \text{logit } P(Y|X_1, X_2) = \alpha_0 + \alpha_1 \frac{e_1 - \gamma_1}{\beta_1} + \alpha_2 \frac{e_2 - \gamma_2}{\beta_2} \\ + \frac{\alpha_{12}}{\beta_1 \cdot \beta_2} (e_1 - \gamma_1)(e_2 - \gamma_2) \end{aligned} \quad (6)$$

279 The synergy of the two gene expressions is given by the coefficient  $\alpha_{12}/(\beta_1 \cdot \beta_2)$  which sign determines  
280 the directionality of the epistatic interactions between the two genes. To the best of our knowledge, this is  
281 the first study which studies epistasis from such a perspective by including eQTL scores in this way and by  
282 moving back and forth between SNP-level and gene-level epistasis. Furthermore, the synergy score in Eq. 5  
283 can also be interpreted as an extension of Mendelian randomization (Davies et al. 2018) to second-order  
284 interaction effects.

285 The eQTLGen consortium (Võsa et al. 2018) does not directly supply the effect sizes  $\beta_1$  and  $\beta_2$  in the  
286 linear expression models. For each SNP, the effect size  $\beta$  is derived from the corresponding  $Z$ -score using  
287 the following relationship:

$$288 \quad \beta = \frac{Z}{\sqrt{2q(1-q)(m+Z^2)}}, \quad (7)$$

289 where  $q$  is the MAF of the SNP of interest, as reported in the 1kG v1p3 ALL reference panel and  $m$   
290 is the cohort size.

291 For the significant interactions, we provide a csv file containing the list of coefficients  $\alpha_{12}$  in addition  
292 to  $(m_1, q_1, Z_1)$ ,  $(m_2, q_2, Z_2)$  and the directionality of the synergy  $\text{dir}(G_1, G_2) \in \{-1, +1\}$  for the eQTL  
293 strategy. One possible approach to appraise the results is to consider a number of summary statistics to  
294 get an overview of the kind of synergies occurring within biological pathways. Interestingly, for all SNP  
295 pairs, the interaction coefficient  $\alpha_{12}$  is positive in 47% of all cases and the directionality of the synergy  
296  $\text{dir}(G_1, G_2)$  is equally split between positive and negative. For the eQTL strategy, we found that  $\alpha_{12}$   
297 and  $\text{dir}(G_1, G_2)$  agree approximately half of the time (48%). This gives further credence to our gene-gene  
298 approach by showing that a different type of information can be obtained by considering more biologically-  
299 relevant gene-level interactions.

300 For each SNP, we also include its PolyPhen (Adzhubei et al. 2013) and SIFT (Ng 2003) scores reported  
301 in BioMart (Kinsella et al. 2011) to better understand its potential deleterious impact on MS. If available,  
302 both scores are comprised between 0 and 1, but with opposite interpretations. For SIFT, 0 denotes a  
303 deleterious amino-acid substitution, while for PolyPhen, 1 denotes an benign substitution. In total, we  
304 obtained 5 variants which were predicted as deleterious by at least one of the two methods.

### 305 **3.3 Biological interpretation**

306 In addition to the preceding statistical analysis, we also conduct a biological analysis of the results for both  
307 mappings. Our analysis is built upon existing information in MetaCore disease maps in conjunction with  
308 relevant literature.

#### 309 **3.3.1 Physical mapping**

310 In total, we obtained 136 epistatic interactions in the 19 disease maps. As an exhaustive analysis of all  
311 interactions is out of reach, an a posteriori filtering is needed. In physical mapping, an epistatic interaction  
312 between two genes corresponds to a change of their protein structure. We therefore retain an interaction  
313 if at least one of the SNPs in the top-scoring pair can lead to a loss of function at the protein level. For  
314 that matter, the SNPs are selected according to the following criteria:

- 315 • Frameshift variant or incomplete terminal codon variant or missense variant or start loss variant,
- 316 • Stop-gained, stop-lost or stop-retained variant,
- 317 • Terminal codon variant.

318 The filtering process yielded 4 gene pairs where one of the the genes presents a missense variant  
319 (Appendix G). For each of these gene pairs, the impact on the MS phenotype is given as specified (activation  
320 or inhibition) or unspecified (unknown), as depicted in Fig 2. Among the obtained 4 pairs, GLI-1 and SUFU  
321 appear to be particularly interesting, since both genes are in direct binding interaction in DM 3305, which  
322 illustrates the SHH (Sonic Hedgehog) signaling in oligodendrocyte precursor cells differentiation in MS  
323 (Appendix E.1).

#### 324 **3.3.2 eQTL mapping**

325 In eQTL mapping, an epistatic interaction consists of a gene pair, the simultaneous up/down-regulation  
326 of which induces a synergistic effect which lowers or increases the risk of MS. To better understand the

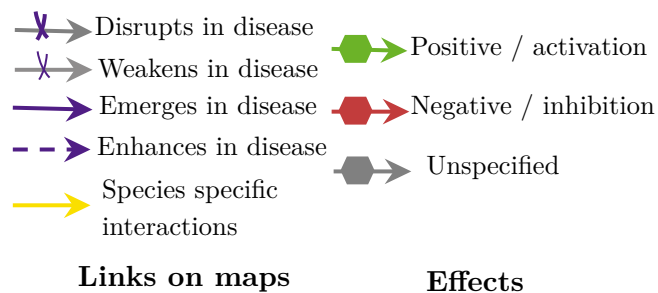

**Figure 2.** The different types of links between proteins/proteins or proteins-phenotypes in MetaCore maps

327 impact of simultaneous gene up-regulation on disease propensity, we differently rewrite Equation 6:

328 
$$\text{logit } P(Y|X_1, X_2) = \alpha_0 + \beta_1 e_1 + \beta_2 e_2 + \beta_{\text{syner}} e_1 e_2, \quad (8)$$

329 where  $\beta_{\text{syner}} = \alpha_{12}/(\beta_1 \cdot \beta_2)$  and the constants  $\alpha_0$ ,  $\beta_1$  and  $\beta_2$  are functions of  $(\alpha_0, \alpha_1, \alpha_2, \alpha_{12})$ ,  $(\gamma_1, \gamma_2)$   
 330 and  $(\beta_1, \beta_2)$ .

331 The impact of gene up-regulation can be assessed through the signs of  $(\beta_1, \beta_2, \beta_{\text{syner}})$ . For instance, if  
 332  $\beta_1, \beta_2$  and  $\beta_{\text{syner}}$  are positive, an increase in the expression of either genes leads to a higher disease risk.  
 333 Hence, a joint inhibition of the two genes reduces the risk. In Table 2, we similarly study all possible sign  
 334 combinations of  $(\beta_1, \beta_2, \beta_{\text{syner}})$  to devise a number of recommendations for the application of epistasis to  
 335 the development of combination therapy.

**Table 2.** Analysis of the impact of genes up-regulation on the risk for humans to develop MS, for each gene individually (signs of  $\beta_1$  and  $\beta_2$ ), and for the pair of genes synergistically (sign of  $\beta_{\text{syner}}$ ) which is epistasis.

| $\beta_1$ | $\beta_2$ | $\beta_{\text{syner}}$ | Impact of $\beta_1$ and $\beta_2$ on MS | Recommendation for combination therapy              |
|-----------|-----------|------------------------|-----------------------------------------|-----------------------------------------------------|
| $> 0$     | $> 0$     | $> 0$                  | detrimental                             | inhibition of the two genes reduces the risk for MS |
| $> 0$     | $> 0$     | $< 0$                  | beneficial                              | genes must not be inhibited                         |
| $< 0$     | $< 0$     | $< 0$                  | beneficial                              | genes could be activated at the same time           |
| $< 0$     | $< 0$     | $> 0$                  | detrimental                             | genes must not be activated                         |
| $> 0$     | $< 0$     | NC                     | NC                                      | NC                                                  |

336 A total of 117 gene pairs in 19 disease maps were obtained with the eQTL mapping strategy. As in  
 337 physical mapping, an additional filtering is needed. We selected the gene pairs in which the coefficients  
 338  $(\beta_1, \beta_2, \beta_{\text{syner}})$  share the same sign (all positive or negative). If positive, the inhibition of both genes reduces  
 339 the risk for MS. By contrast, if negative, the two genes should be jointly activated to reduce MS risk. This  
 340 filtering led to 25 gene pairs of interest across 13 maps. Since a thorough study of all 25 pairs is impossible,  
 341 we implemented an additional filtering criterion: existence of a specified effect on MS-related phenotypes

342 e.g. demyelination, remyelination failure, oligodendrocyte death, damage of neural axons, etc. The effect  
343 nature is given by the arrow types (see Figure 2). This final filter led to 9 gene pairs to consider (see  
344 Appendix F).

345 Confident in the single gene pair where both genes have a specified impact on the phenotype, NF- $\kappa$ B  
346 and IP10 (see Appendix H), we have investigated in further details their role in MS in the aim of assessing  
347 their synergistic effect on MS physio-pathology. Our analysis is focused on DM 5199 (see Appendix E.3)  
348 where both genes belong to essential pathways.

349 **Role of IP10 in MS: recruitment of T cell in the CNS** IP10 (or IP-10 / CXCL10 (C-X-C  
350 motif chemokine ligand 10) / Interferon-Inducible Cytokine IP-10) is an antimicrobial gene which encodes  
351 a chemokine of the CXC subfamily, and is a ligand for the receptor CXCR3. This pro-inflammatory  
352 cytokine is involved in a wide variety of processes such as chemotaxis, differentiation, and activation of  
353 peripheral immune cells, like monocytes, natural killer, T-cell migration, and modulation of adhesion  
354 molecule expression (Romagnani et al. 2001; Antonia et al. 2019; Tokunaga et al. 2018).

355 IP-10 is strongly induced by IFN- $\gamma$  as well as by IFN- $\alpha/\beta$  (Qian et al. 2006). In vitro, CXCL10 can  
356 also be induced by NF- $\kappa$ B, and has been shown to have an early role in hypoxia-induced inflammation  
357 (Schmid et al. 2006; Xia et al. 2016). Indeed, in the disease map, the activation of IP10 by NF- $\kappa$ B is  
358 clearly indicated by an activation arrow (green arrow). Thus, the two genes are in direct interaction, where  
359 NF- $\kappa$ B regulates the transcription of IP10.

360 DM 5199, which contains IP10 and NF- $\kappa$ B, is focused on the impact of beta-2 adrenergic receptors,  
361 which are lacking in astrocytes in MS. This lack enables IFN- $\gamma$  and TNF- $\alpha$  to trigger the expression of  
362 several key pro-inflammatory genes (Keyser, Zeinstra, et al. 2004; Keyser, Laureys, et al. 2010). Whereas  
363 human astrocytes are only partially competent antigen presenting cells, the upregulation of MHC-II by  
364 IFN- $\gamma$  alone or in combination with TNF- $\alpha$  enables astrocytes to present myelin as an auto-antigen, and  
365 triggers the production of the co-stimulatory molecules C80 and CD86 at their surface. Experimentally,  
366 the expression of MHC-class I and MHC-class II, together with the co-stimulatory molecules CD80 and  
367 CD86, is detectable in astrocytes in MS plaques (TRAUGOTT and LEBON 1988).

368 After the transformation of astrocytes in immuno-competent cells, IP10 plays a major role by activating  
369 the recruitment of Th1 cells into the CNS (Fig 3a). Indeed, in MS, activated CXCR3+ T-cells (IP10 is  
370 the ligand for the receptor CXCR3) enter the CNS, and can be located in the cerebrospinal fluid or in  
371 the brain parenchyma (Lassmann and Ransohoff 2004). This transport is made possible due to the blood  
372 Brain Barrier disruption in MS (Minagar and Alexander 2003).

373 Arriving in the CNS, T lymphocytes recognize astrocytes via their MHC-II, and anchor them via

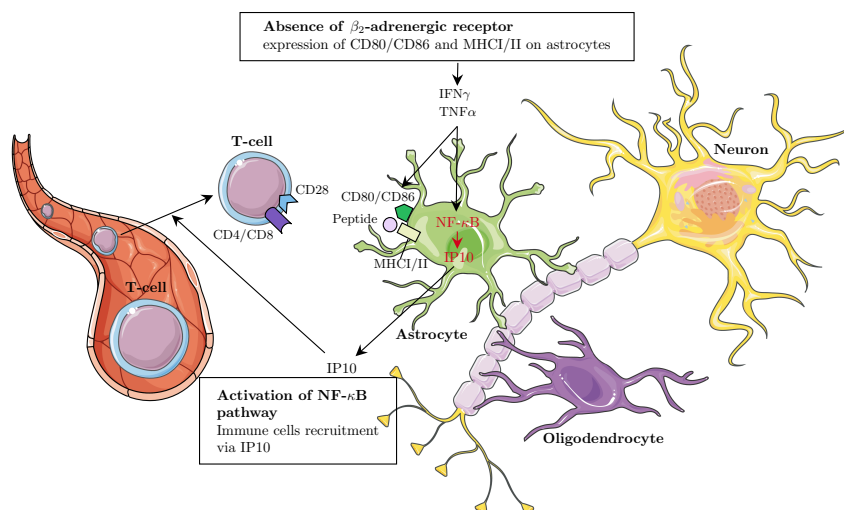

(a) Transformation of astrocytes in immunocompetent cells and T-cells recruitment following the NF- $\kappa$ B/IP10 axis activation in MS.

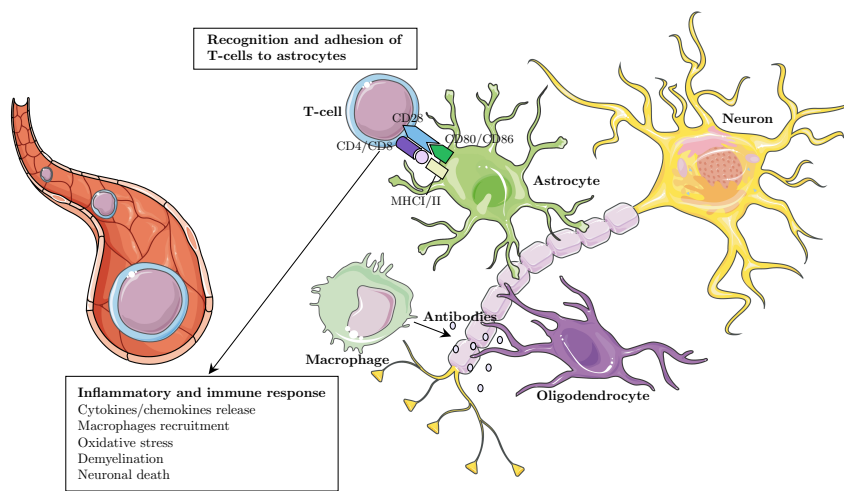

(b) After recruitment of T-cells, adhesion of T-cell/astrocyte leads to inflammatory and immune response inducing neuron damage.

**Figure 3.** Schematic representation of the role played by the gene pairs NF- $\kappa$ B/IP10 in the development of demyelination in MS.

374 their CD28 which binds to CD80 and CD86 on astrocytes. This intercellular contact between T cells and  
 375 astrocytes presenting myelin antigens induces the reactivation of T cells in the CNS (Cornet et al. 2000). T  
 376 cells then secrete pro-inflammatory cytokines; demyelination occurs and macrophages are activated. This  
 377 further damages myelin and releases cytokines - but also phagocytosing myelin debris - which leads to the  
 378 damage of neural axons (A Williams et al. 2007) (see Fig 3b).



379 **Role of NF- $\kappa$ B in MS: transcription regulation** Astrocyte reactivity is regulated by key canon-  
380 ical signaling cascades, among which the NF- $\kappa$ B pathway is qualified as pivotal for establishing neuroin-  
381 flammation (Ponath et al. 2018). TNF- $\alpha$  binds to TNF-R1, which is constitutively expressed in astrocytes,  
382 and activates NF- $\kappa$ B signaling pathway (Liang et al. 2004). In cytoplasm, NF- $\kappa$ B is inhibited by I- $\kappa$ B  
383 proteins. Phosphorylation of I- $\kappa$ B by IKK (cat) kinase complex marks I- $\kappa$ B for destruction via the ubiqui-  
384 tination pathway, thereby allowing activation of NF- $\kappa$ B complex (Liang et al. 2004). The activated NF- $\kappa$ B  
385 translocates into the nucleus and upregulates transcription of target genes including IP10 (Majumder et al.  
386 1998).

387 **Status of IP10 and NF- $\kappa$ B as potential targets in MS treatment assays** Human IP10  
388 is a secreted protein, and is mainly located in the extracellular space, but also in the plasma membrane,  
389 and to a lesser extent in the cytosol and nucleus (Source: UniProtKB/Swiss-Prot). Today, the ChEMBL  
390 database indicates that two antibodies of IP10 are studied in clinical trials: NI-0801 (Phase I completed for  
391 allergic contact dermatitis, Phase II terminated for primary biliary cirrhosis) and ELDELUMAB (phase  
392 II mainly for rheumatoid arthritis, ulcerative colitis and Crohn's disease; source: Open Targets (Carvalho-  
393 Silva et al. 2018b)). The fact that, except for allergic contact dermatitis, all of these diseases belong to the  
394 auto-immune diseases family like MS, suggests that IP10 can be a valuable target for MS.

395 NF- $\kappa$ B is extensively present in the cytosol and the nucleus, to a lesser extent in the extracellular  
396 space, but not in the plasma membrane (Source: UniProtKB/Swiss-Prot). No small molecule or antibody  
397 is currently under clinical study for a direct blockade of NF- $\kappa$ B, since it is inhibited by I- $\kappa$ B proteins in  
398 cytoplasm.

399 Clinical assays trying to inhibit NF- $\kappa$ B have so far focused on its upstream regulators. The phos-  
400 phorylation of I- $\kappa$ B by the IKK (cat) kinase complex marks I- $\kappa$ B for destruction via the ubiquitination  
401 pathway, thereby allowing the activation of the NF- $\kappa$ B complex (Iwai 2012). Different research groups  
402 tried to inhibit undesired NF- $\kappa$ B activity at several regulatory levels (Calzado et al. 2007). For example,  
403 inhibitors of IKKB-beta (or IKBKB: Inhibitor Of Nuclear Factor Kappa B Kinase Subunit Beta) aim at  
404 blocking the kinase which phosphorylates inhibitors of NF-kappa-B on two critical serine residues. Several  
405 small molecules antagonists targeting IKBKB are in phase I, II and III clinical trials for several diseases  
406 (source: Open Target (Carvalho-Silva et al. 2018b)).

407 Downstream of NF- $\kappa$ B, glucocorticoids receptors (GR) also constitute an interesting research direction.  
408 Ligand-bound GR is able to antagonize the activity of immunogenic transcription factors such as nuclear  
409 factor- $\kappa$ B (NF- $\kappa$ B)3, AP-14,5, and T-bet6; resulting in a potent attenuation of inflammation (Hudson et al.  
410 2018).

411 Altogether, these clinical assays for IP10 and NF- $\kappa$ B pathway inhibitors strengthen the potential of  
412 the pair as MS targets, where their simultaneous inhibition lowers the risk for MS.

## 413 4 Discussion

414 We study gene-gene interactions for a number of disease maps related to multiple sclerosis. Nonetheless, the  
415 pipeline we describe here can be generalized to other diseases. It is based on epiGWAS, a SNP-level epistasis  
416 detection tool that we extend to the study of gene-level epistasis. Within each disease map, we obtained a  
417 number of significant interactions that formed novel subnetworks. Notably, we have shown complementarity  
418 between two different SNP-to-gene mappings: eQTL mapping and physical mapping. We identified 4 gene  
419 interactions mediated by potential function modifying variants. Among these interactions we retrieve  
420 one known direct binding interaction between GLI-I and SUFU, involved in oligodendrocyte precursor  
421 cells differentiation in MS. We also identified 25 gene interactions mediated by eQTLs, in particular a  
422 IP10-NFKB interaction where each gene separately has a known impact on MS. We show that the epistasis  
423 mechanism probably pass through the known regulation of IP10 transcription by NFKB. These observations  
424 validate that epistasis analysis can reveal biological interactions and confort the use of this methodology to  
425 predict new biology. To the best of our knowledge, our work is the first application of an epistasis detection  
426 tool to a specific disease which is followed by an in-depth statistical analysis and biological interpretation  
427 of the results. Nonetheless, more biological and experimental validation is needed to confirm the discovered  
428 interactions.

## 429 5 Data access

430 This study makes use of data generated by the Wellcome Trust Case-Control Consortium. A full list of the  
431 investigators who contributed to the generation of the data is available from [www.wtccc.org.uk](http://www.wtccc.org.uk). Funding  
432 for the project was provided by the Wellcome Trust under award 076113, 085475 and 090355.

## 433 References

434 Adzhubei I, Jordan DM, and Sunyaev SR. 2013. Predicting Functional Effect of Human Missense  
435 Mutations Using PolyPhen-2. *Current Protocols in Human Genetics*. **76**: 7.20.1–7.20.41.

- 436 Ahrendsen JT, Harlow DE, Finseth LT, Bourne JN, Hickey SP, Gould EA, Culp CM, and Mack-  
437 lin WB. 2017. The Protein Tyrosine Phosphatase Shp2 Regulates Oligodendrocyte Differ-  
438 entiation and Early Myelination and Contributes to Timely Remyelination. *The Journal of*  
439 *Neuroscience*. **38**: 787–802.
- 440 Antonia AL et al. 2019. Pathogen Evasion of Chemokine Response Through Suppression of  
441 CXCL10. *Frontiers in Cellular and Infection Microbiology*. **9**:
- 442 Baranzini SE and Oksenberg JR. 2017. The Genetics of Multiple Sclerosis: From 0 to 200 in 50  
443 Years. *Trends in Genetics*. **33**: 960–970.
- 444 Bush WS and Moore JH. 2012. Chapter 11: Genome-Wide Association Studies. *PLoS Computa-*  
445 *tional Biology*. **8**:
- 446 Calzado M, Bacher S, and Schmitz ML. 2007. NF- $\kappa$ B Inhibitors for the Treatment of  
447 Inflammatory Diseases and Cancer. *Current Medicinal Chemistry*. **14**: 367–376.
- 448 Carvalho-Silva D et al. 2018a. Open Targets Platform: new developments and updates two years  
449 on. *Nucleic Acids Research*. **47**: D1056–D1065.
- 450 Carvalho-Silva D et al. 2018b. Open Targets Platform: new developments and updates two years  
451 on. *Nucleic Acids Research*. **47**: D1056–D1065.
- 452 Cornet A, Bettelli E, Oukka M, Cambouris C, Avellana-Adalid V, Kosmatopoulos K, and Liblau  
453 RS. 2000. Role of astrocytes in antigen presentation and naive T-cell activation. *Journal of*  
454 *Neuroimmunology*. **106**: 69–77.
- 455 Cotsapas C and Mitrovic M. 2018. Genome-wide association studies of multiple sclerosis. *Clinical*  
456 *& Translational Immunology*. **7**: e1018.
- 457 Couturier N et al. 2011. Tyrosine kinase 2 variant influences T lymphocyte polarization and  
458 multiple sclerosis susceptibility. *Brain*. **134**: 693–703.
- 459 Dargahi N, Katsara M, Tselios T, Androutsou ME, Courten M de, Matsoukas J, and Apostolopou-  
460 los V. 2017. Multiple Sclerosis: Immunopathology and Treatment Update. *Brain Sciences*. **7**:  
461 78.
- 462 Davies NM, Holmes MV, and Smith GD. 2018. Reading Mendelian randomisation studies: a guide,  
463 glossary, and checklist for clinicians. *BMJ*. k601.
- 464 Dean G et al. 2007. HLA-DRB1 and multiple sclerosis in Malta. *Neurology*. **70**: 101–105.

- 465 Dyment DA. 2006. Multiple sclerosis in stepsiblings: recurrence risk and ascertainment. *Journal*  
466 *of Neurology, Neurosurgery & Psychiatry*. **77**: 258–259.
- 467 Dyment DA, Ebers GC, and Sadovnick AD. 2004. Genetics of multiple sclerosis. *The Lancet*.  
468 *Neurology*. **3**: 104–10.
- 469 Ekins S, Nikolsky Y, Bugrim A, Kirillov E, and Nikolskaya T (2006). Pathway Mapping Tools for  
470 Analysis of High Content Data. In: *High Content Screening: A Powerful Approach to Systems*  
471 *Cell Biology and Drug Discovery*. Ed. by DL Taylor, JR Haskins, and KA Giuliano. Totowa,  
472 NJ: Humana Press, pp. 319–350.
- 473 Galarza-Muñoz G et al. 2017. Human Epistatic Interaction Controls IL7R Splicing and Increases  
474 Multiple Sclerosis Risk. *Cell*. **169**: 72–84.e13.
- 475 Goldenberg MM. 2012. Multiple sclerosis review. *P & T : a peer-reviewed journal for formulary*  
476 *management*. **37**: 175–184.
- 477 Gregory SG et al. 2007. Interleukin 7 receptor alpha chain (IL7R) shows allelic and functional  
478 association with multiple sclerosis. *Nature genetics*. **39**: 1083–91.
- 479 Harty BL et al. 2019. Myelinating Schwann cells ensheath multiple axons in the absence of E3  
480 ligase component Fbxw7. *Nature Communications*. **10**: 2976.
- 481 Hudson WH, Vera IMS de, Nwachukwu JC, Weikum ER, Herbst AG, Yang Q, Bain DL, Nettles  
482 KW, Kojetin DJ, and Ortlund EA. 2018. Cryptic glucocorticoid receptor-binding sites pervade  
483 genomic NF- $\kappa$ B response elements. *Nature Communications*. **9**:
- 484 Ishkin A (2019). metabaser: Library of functions to work with Clarivate Analytics' MetaBase. R  
485 package version 4.4.0.
- 486 Iwai K. 2012. Diverse ubiquitin signaling in NF- $\kappa$ B activation. *Trends in Cell Biology*. **22**: 355–  
487 364.
- 488 Jager PLD et al. 2009. The role of the CD58 locus in multiple sclerosis. *Proceedings of the National*  
489 *Academy of Sciences*. **106**: 5264–5269.
- 490 Keyser JD, Laureys G, Demol F, Wilczak N, Mostert J, and Clinckers R. 2010. Astrocytes as  
491 potential targets to suppress inflammatory demyelinating lesions in multiple sclerosis. *Neuro-*  
492 *chemistry International*. **57**: 446–450.

- 493 Keyser JD, Zeinstra E, and Wilczak N. 2004. Astrocytic  $\beta$ 2-adrenergic receptors and multiple  
494 sclerosis. *Neurobiology of Disease*. **15**: 331–339.
- 495 Kinsella RJ et al. 2011. Ensembl BioMart: a hub for data retrieval across taxonomic space.  
496 *Database*. **2011**: bar030–bar030.
- 497 Lassmann H and Ransohoff RM. 2004. The CD4–Th1 model for multiple sclerosis: a crucial re-  
498 appraisal. *Trends in Immunology*. **25**: 132–137.
- 499 Liang Y, Zhou Y, and Shen P. 2004. NF-kappaB and its regulation on the immune system. *Cellular*  
500 *& molecular immunology*. **1**: 343–50.
- 501 Lincoln MR, Ramagopalan SV, Chao MJ, Herrera BM, DeLuca GC, Orton SM, Dyment DA,  
502 Sadovnick AD, and Ebers GC. 2009. Epistasis among HLA-DRB1, HLA-DQA1, and HLA-  
503 DQB1 loci determines multiple sclerosis susceptibility. *Proceedings of the National Academy*  
504 *of Sciences*. **106**: 7542–7547.
- 505 Lunceford JK and Davidian M. 2004. Stratification and weighting via the propensity score in  
506 estimation of causal treatment effects: A comparative study. *Statistics in Medicine*. **23**: 2937–  
507 2960.
- 508 Majumder S, Zhou L, Chaturvedi P, Babcock G, Aras S, and Ransohoff R. 1998. Regulation  
509 of human IP-10 gene expression in astrocytoma cells by inflammatory cytokines. *Journal of*  
510 *Neuroscience Research*. **54**: 169–180.
- 511 Minagar A and Alexander JS. 2003. Blood-brain barrier disruption in multiple sclerosis. *Multiple*  
512 *Sclerosis Journal*. **9**: 540–549.
- 513 Moore JH and Williams SM. 2005. Traversing the conceptual divide between biological and sta-  
514 tistical epistasis: systems biology and a more modern synthesis. *BioEssays*. **27**: 637–646.
- 515 Ng PC. 2003. SIFT: predicting amino acid changes that affect protein function. *Nucleic Acids*  
516 *Research*. **31**: 3812–3814.
- 517 Pagès H (2017). SNPlocs.Hsapiens.dbSNP144.GRCh37: SNP locations for Homo sapiens (dbSNP  
518 Build 144). R package version 0.99.20.
- 519 Phillips PC. 2008. Epistasis – the essential role of gene interactions in the structure and evolution  
520 of genetic systems. *Nature Reviews Genetics*. **9**: 855–867.

- 521 Ponath G, Park C, and Pitt D. 2018. The Role of Astrocytes in Multiple Sclerosis. *Frontiers in*  
522 *Immunology*. **9**:
- 523 Qian C, An H, Yu Y, Liu S, and Cao X. 2006. TLR agonists induce regulatory dendritic cells  
524 to recruit Th1 cells via preferential IP-10 secretion and inhibit Th1 proliferation. *Blood*. **109**:  
525 3308–3315.
- 526 Rabiner L. 1989. A tutorial on hidden Markov models and selected applications in speech recog-  
527 nition. *Proceedings of the IEEE*. **77**: 257–286.
- 528 Reuss R, Mistrarz M, Mirau A, Kraus J, Bödeker RH, and Oschmann P. 2014. FADD Is Upregu-  
529 lated in Relapsing Remitting Multiple Sclerosis. *Neuroimmunomodulation*. **21**: 221–225.
- 530 Rivals I, Personnaz L, Taing L, and Potier MC. 2006. Enrichment or depletion of a GO category  
531 within a class of genes: which test? *Bioinformatics*. **23**: 401–407.
- 532 Romagnani P et al. 2001. Interferon-inducible protein 10, monokine induced by interferon gamma,  
533 and interferon-inducible T-cell alpha chemoattractant are produced by thymic epithelial cells  
534 and attract T-cell receptor (TCR)  $\alpha\beta$ +CD8+ single-positive T cells, TCR $\gamma\delta$ + T cells, and  
535 natural killer-type cells in human thymus. *Blood*. **97**: 601–607.
- 536 Sawcer S, Franklin RJM, and Ban M. 2014. Multiple sclerosis genetics. *The Lancet Neurology*. **13**:  
537 700–709.
- 538 Sawcer S, Hellenthal G, et al. 2011. Genetic risk and a primary role for cell-mediated immune  
539 mechanisms in multiple sclerosis. *Nature*. **476**: 214–219.
- 540 Scheet P and Stephens M. 2006. A Fast and Flexible Statistical Model for Large-Scale Popula-  
541 tion Genotype Data: Applications to Inferring Missing Genotypes and Haplotypic Phase. *The*  
542 *American Journal of Human Genetics*. **78**: 629–644.
- 543 Schmid H et al. 2006. Modular Activation of Nuclear Factor- B Transcriptional Programs in  
544 Human Diabetic Nephropathy. *Diabetes*. **55**: 2993–3003.
- 545 Shaffer JP. 1995. Multiple Hypothesis Testing. *Annual Review of Psychology*. **46**: 561–584.
- 546 Slim L, Chatelain C, Azencott CA, and Vert JP. 2018. Novel Methods for Epistasis Detection in  
547 Genome-Wide Association Studies. *bioRxiv*.
- 548 Sun X et al. 2010. Myelin Activates FAK/Akt/NF- $\kappa$ B Pathways and Provokes CR3-Dependent  
549 Inflammatory Response in Murine System. *PLoS ONE*. **5**: e9380.

- 550 Tokunaga R, Zhang W, Naseem M, Puccini A, Berger MD, Soni S, McSkane M, Baba H, and  
551 Lenz HJ. 2018. CXCL9, CXCL10, CXCL11/CXCR3 axis for immune activation – A target for  
552 novel cancer therapy. *Cancer Treatment Reviews*. **63**: 40–47.
- 553 TRAUGOTT U and LEBON P. 1988. Demonstration of  $\alpha$ ,  $\beta$ , and  $\gamma$  Interferon in Active Chronic  
554 Multiple Sclerosis Lesions. *Annals of the New York Academy of Sciences*. **540**: 309–311.
- 555 VanderWeele TJ and Knol MJ. 2014. A Tutorial on Interaction. *Epidemiologic Methods*. **3**:  
556 Võsa U et al. 2018. Unraveling the polygenic architecture of complex traits using blood eQTL  
557 metaanalysis.
- 558 Williams A, Piaton G, and Lubetzki C. 2007. Astrocytes-Friends or foes in multiple sclerosis?  
559 *Glia*. **55**: 1300–1312.
- 560 Xia JB et al. 2016. Hypoxia/ischemia promotes CXCL10 expression in cardiac microvascular  
561 endothelial cells by NFkB activation. *Cytokine*. **81**: 63–70.
