# Supplementary material for: A systematic analysis of gene-gene interaction in multiple sclerosis
Source: bioRxiv or medRxiv preprint supplement (doi:10.1101/2020.05.28.121939), 2020-05-30
Supplement: Supplementary file [file media-1.pdf]

# A systematic analysis of gene-gene interaction in multiple sclerosis Supplementary Materials

## A Distribution of SNPs in MS disease maps

Table 1: SNP and gene distributions in each disease map for eQTL and physical mappings

| internal ID | Physical mapping |        |                           | eQTL mapping |        |                           |
|-------------|------------------|--------|---------------------------|--------------|--------|---------------------------|
|             | #SNPs            | #genes | average #SNPs<br>per gene | #SNPs        | #genes | average #SNPs<br>per gene |
| 3302        | 416              | 21     | 19.81                     | 833          | 19     | 43.84                     |
| 3305        | 70               | 10     | 7.00                      | 238          | 8      | 29.75                     |
| 3306        | 383              | 21     | 18.24                     | 869          | 19     | 45.74                     |
| 4455        | 755              | 38     | 19.87                     | 1813         | 36     | 50.36                     |
| 4593        | 1295             | 24     | 53.96                     | 1647         | 17     | 96.88                     |
| 4693        | 544              | 34     | 16.00                     | 912          | 27     | 33.78                     |
| 4703        | 331              | 28     | 11.82                     | 999          | 27     | 37.00                     |
| 4791        | 252              | 24     | 10.50                     | 1264         | 23     | 54.96                     |
| 4794        | 84               | 15     | 5.60                      | 331          | 12     | 27.58                     |
| 4843        | 984              | 32     | 30.75                     | 1401         | 29     | 48.31                     |
| 4846        | 1318             | 36     | 36.61                     | 1555         | 32     | 48.59                     |
| 4901        | 1173             | 35     | 33.51                     | 1209         | 24     | 50.38                     |
| 5199        | 656              | 28     | 23.43                     | 1320         | 32     | 41.25                     |
| 5288        | 515              | 27     | 19.07                     | 724          | 22     | 32.91                     |
| 5378        | 257              | 22     | 11.68                     | 907          | 22     | 41.23                     |
| 5398        | 141              | 21     | 6.71                      | 1050         | 24     | 43.75                     |
| 5518        | 392              | 29     | 13.52                     | 1474         | 27     | 54.59                     |
| 5601        | 348              | 28     | 12.43                     | 742          | 25     | 29.68                     |
| 5611        | 224              | 22     | 10.18                     | 906          | 24     | 37.75                     |

## B Visualization of epiGWAS results on MetaCore disease maps

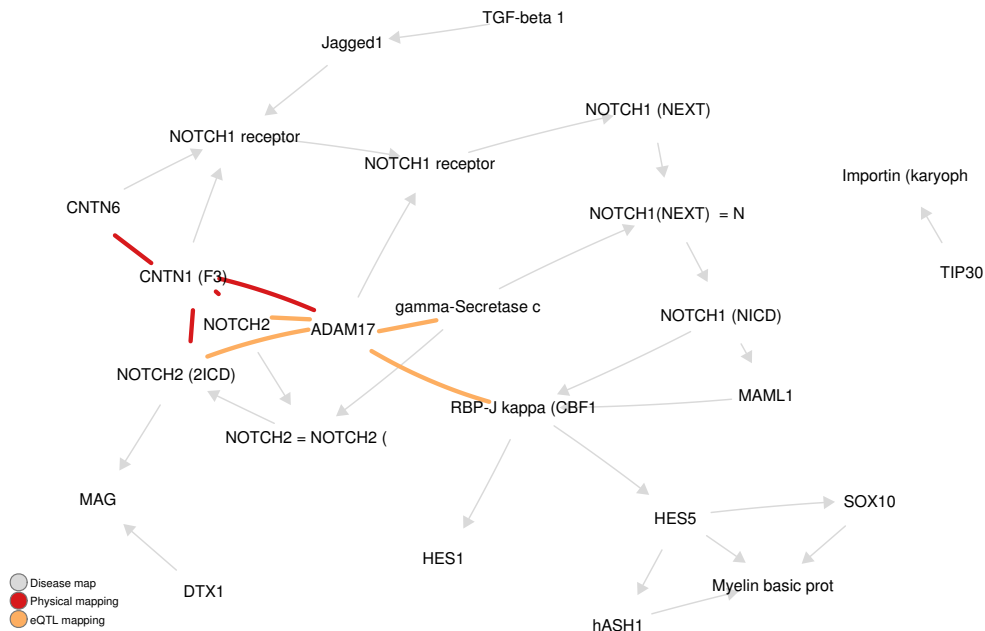

(a) DM 3302: Notch signaling in oligodendrocyte precursor cell differentiation in multiple sclerosis

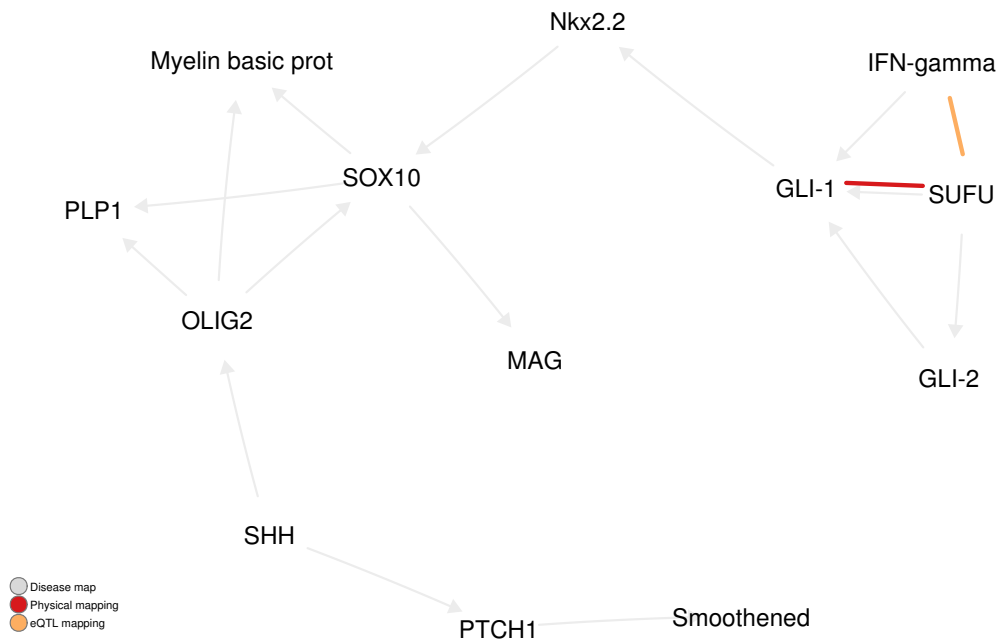

(b) DM 3305: SHH signaling in oligodendrocyte precursor cells differentiation in multiple sclerosis

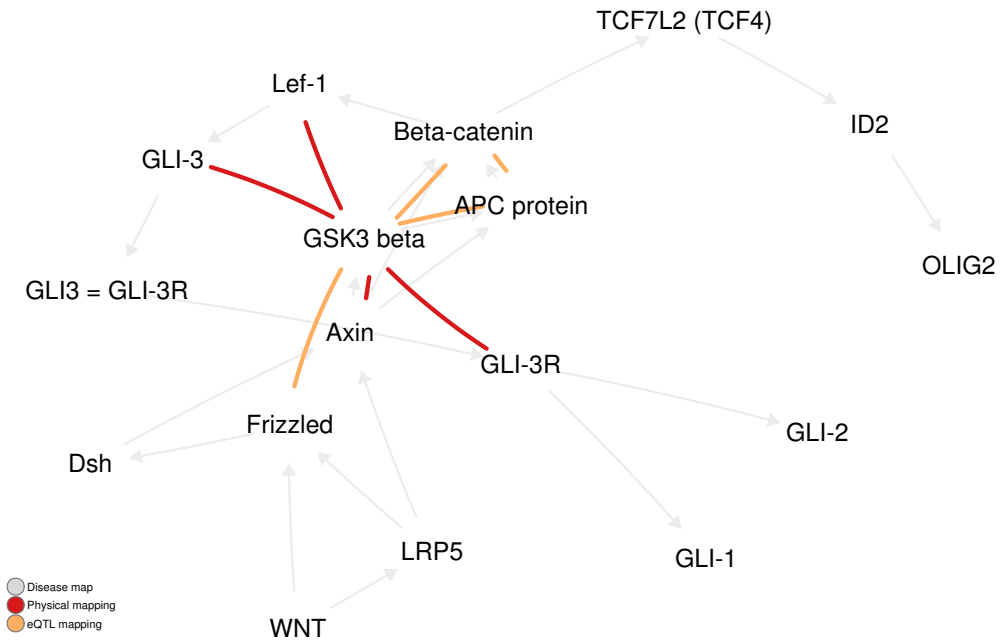

(c) DM 3306: Inhibition of oligodendrocyte precursor cells differentiation by Wnt signaling in multiple sclerosis

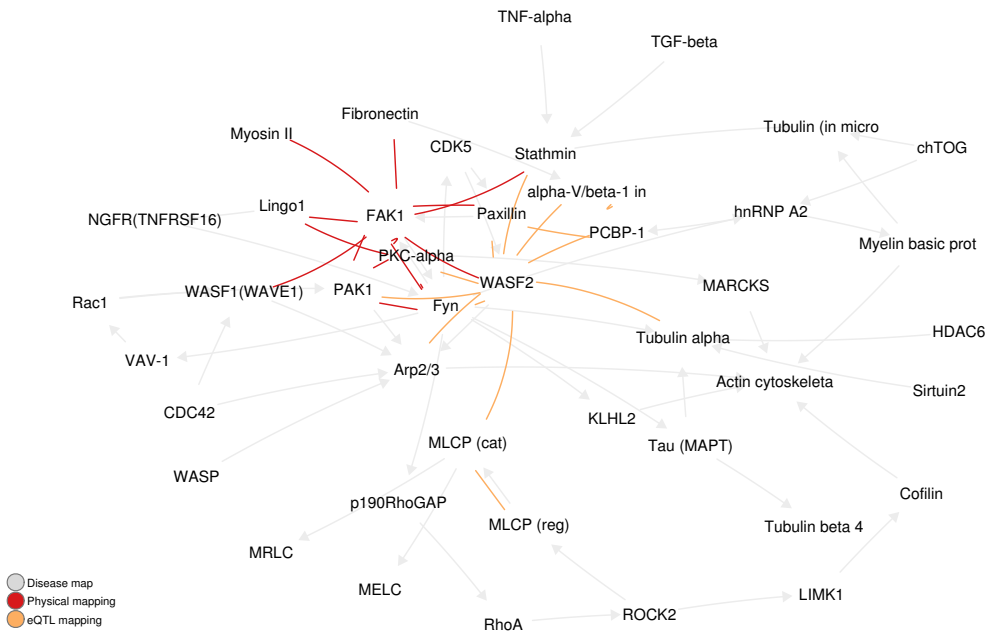

(d) DM 4455: Inhibition of remyelination in multiple sclerosis: regulation of cytoskeleton proteins

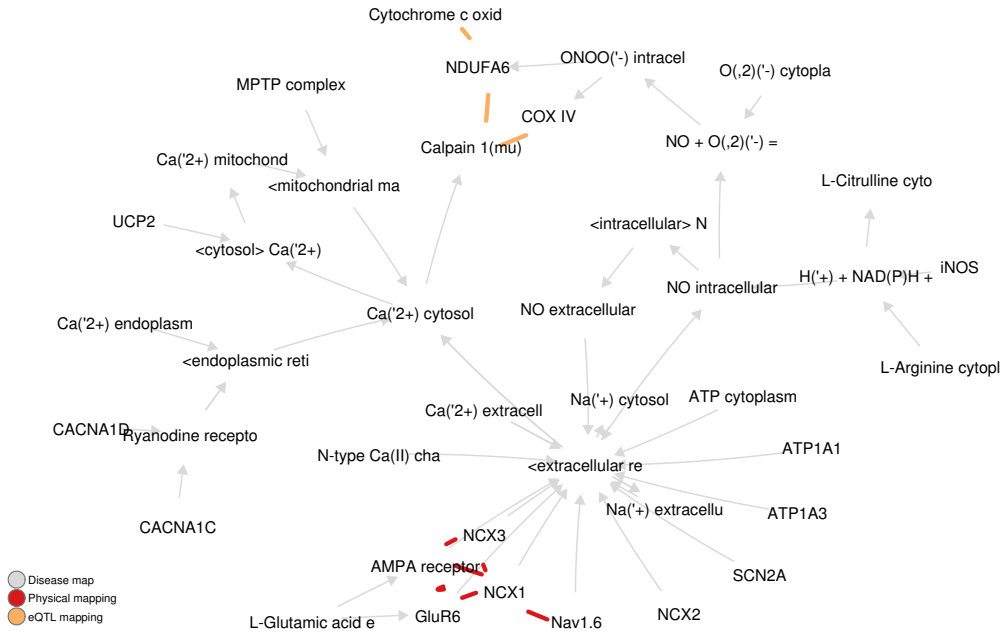

(e) DM 4593: Axonal degeneration in multiple sclerosis

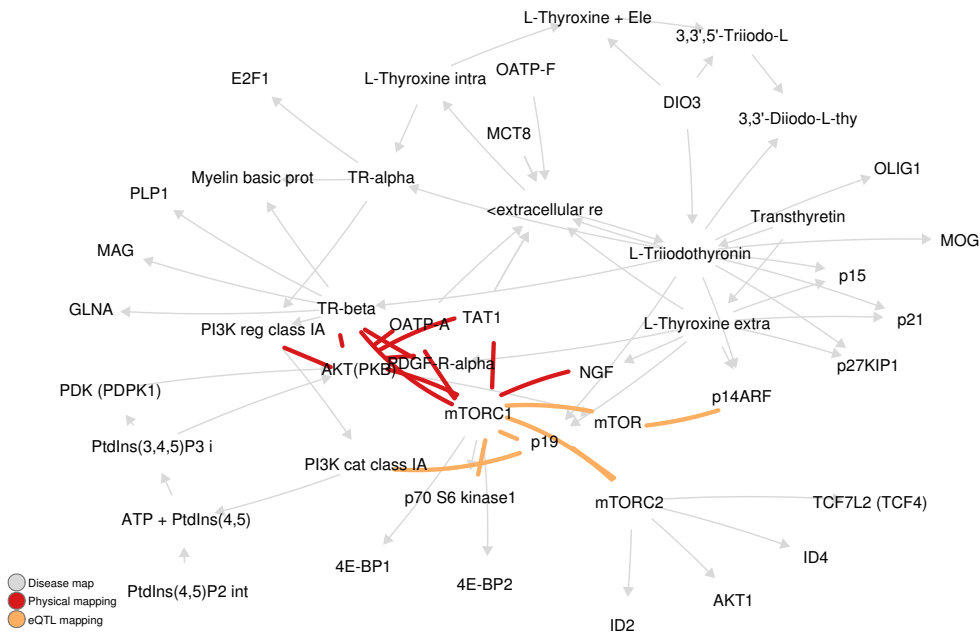

(f) DM 4693: Role of Thyroid hormone in regulation of oligodendrocyte differentiation in multiple sclerosis

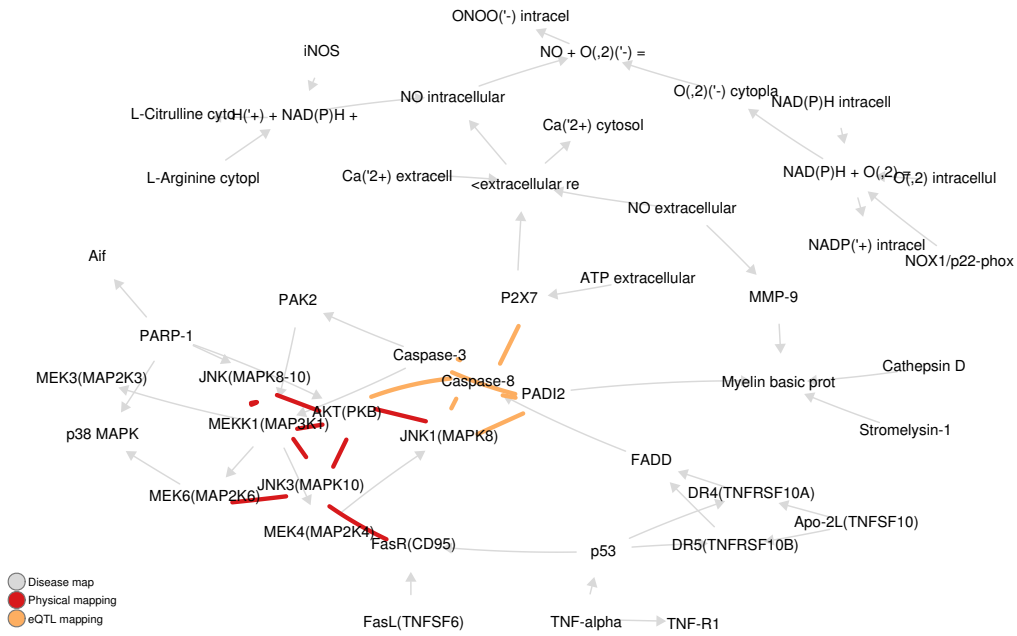

(g) DM 4703: Demyelination in multiple sclerosis

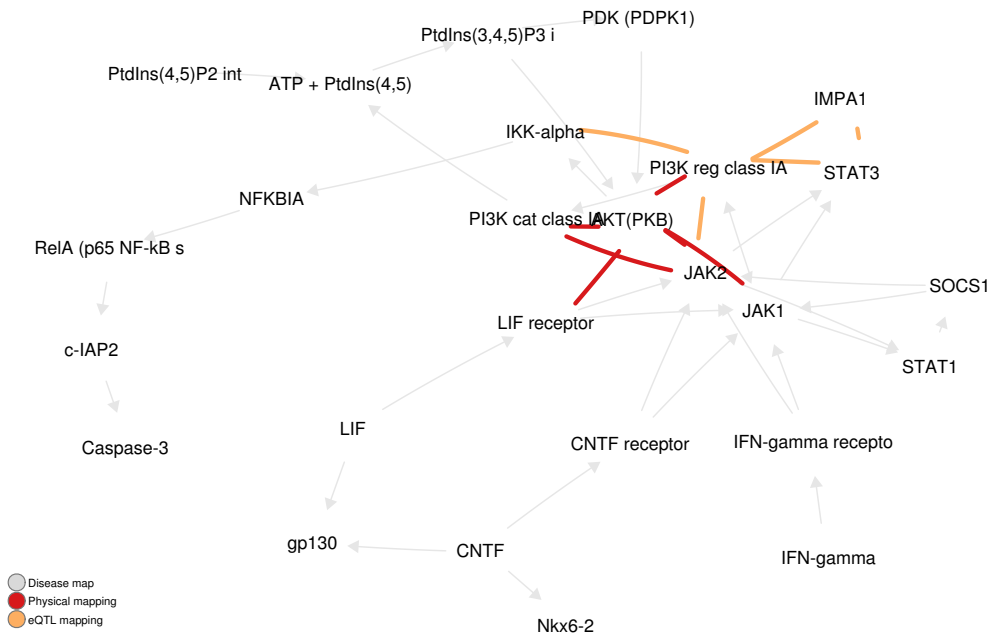

(h) DM 4791: Role of CNTF and LIF in regulation of oligodendrocyte development in multiple sclerosis

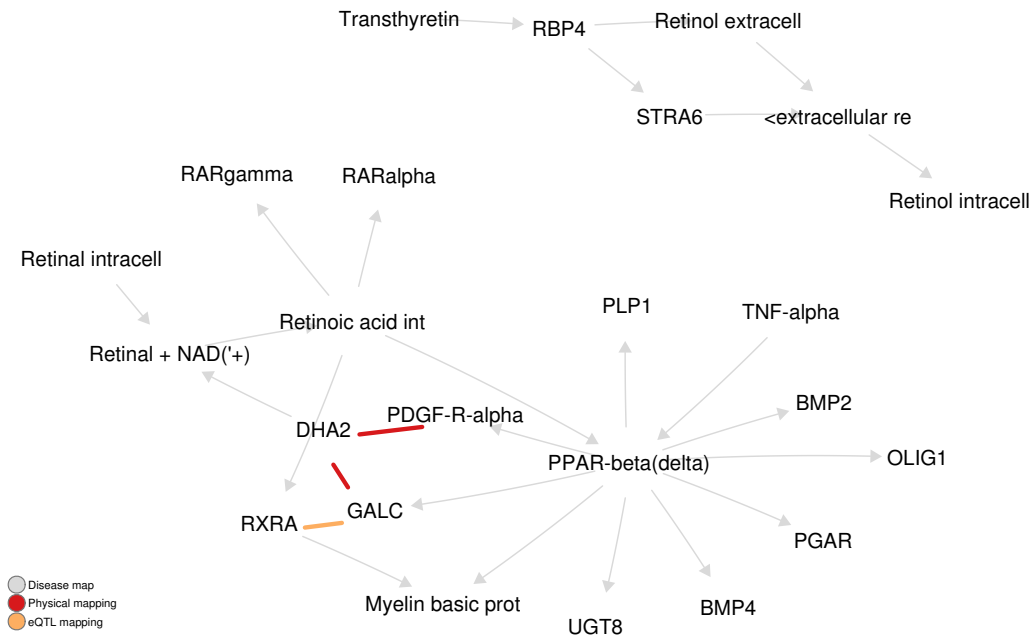

(i) DM 4794: Retinoic acid regulation of oligodendrocyte differentiation in multiple sclerosis

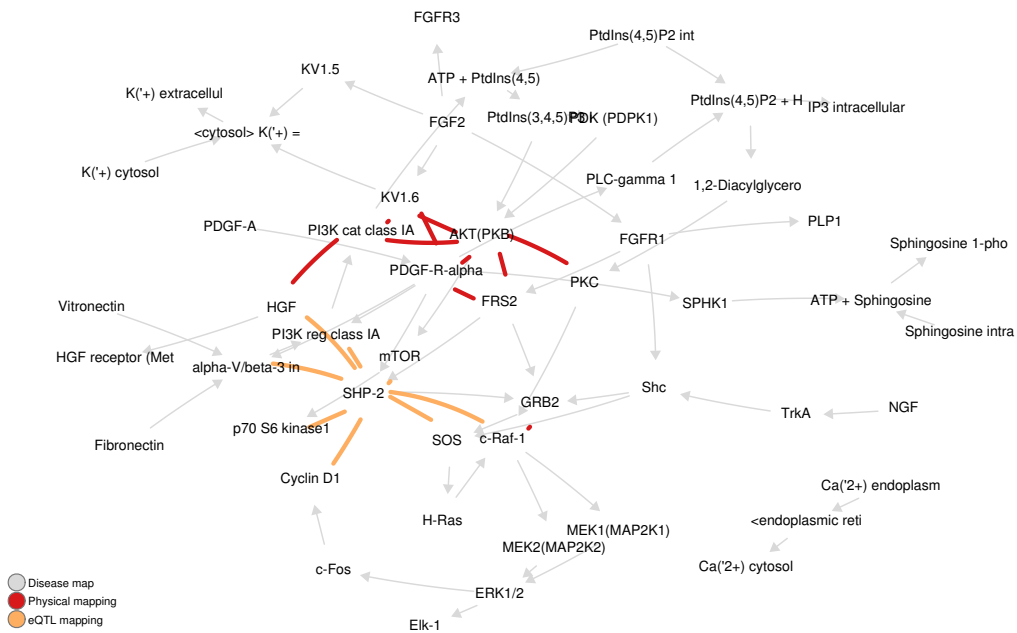

(j) DM 4843: Growth factors in regulation of oligodendrocyte precursor cells proliferation in multiple sclerosis

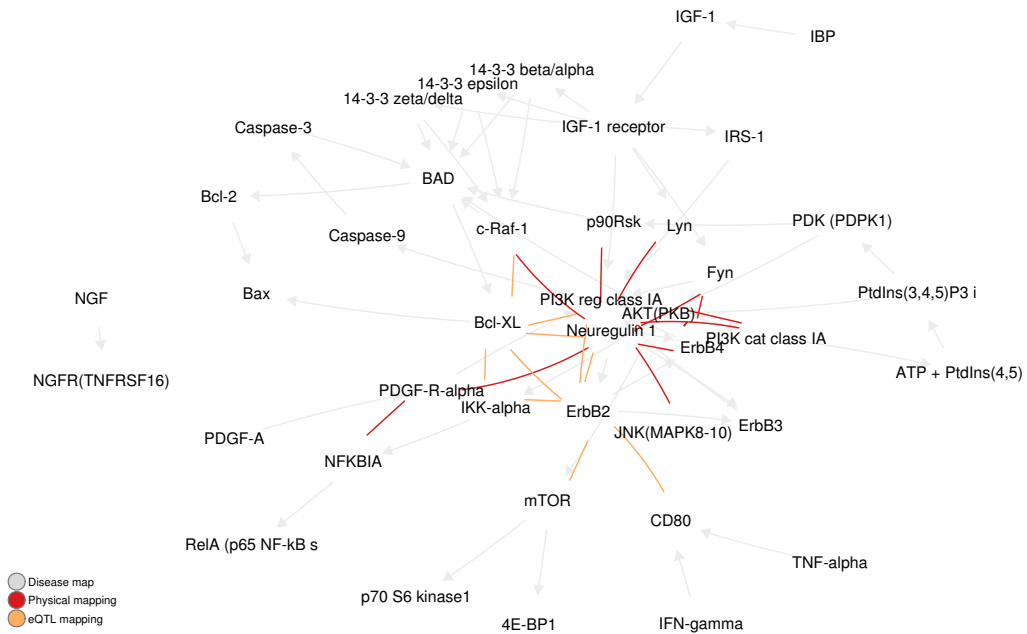

(k) DM 4846: Growth factors in regulation of oligodendrocyte precursor cells survival in multiple sclerosis

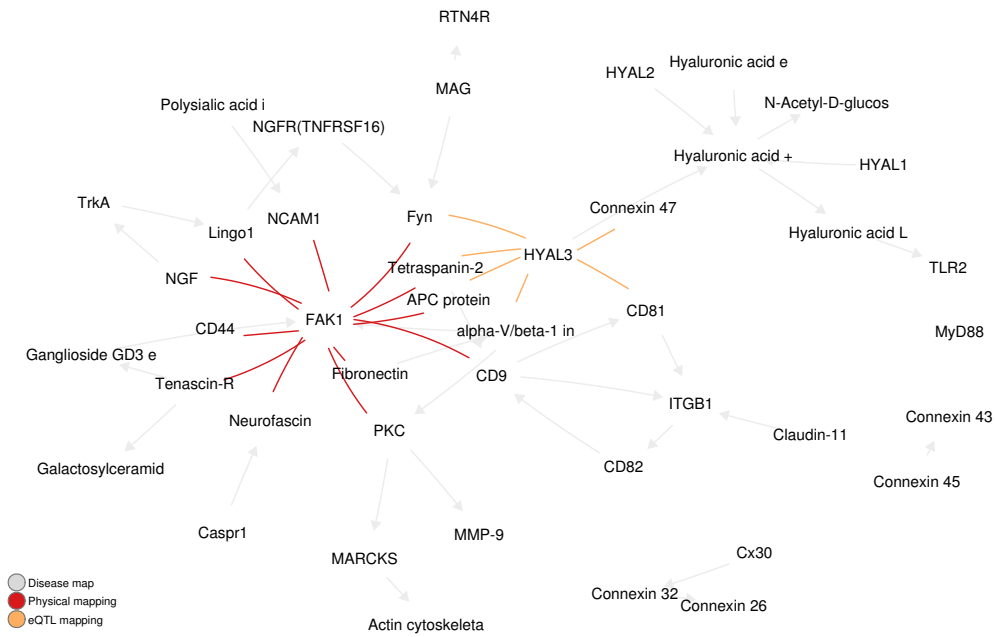

(l) DM 4901: Inhibition of remyelination in multiple sclerosis: role of cell-cell and ECM-cell interactions

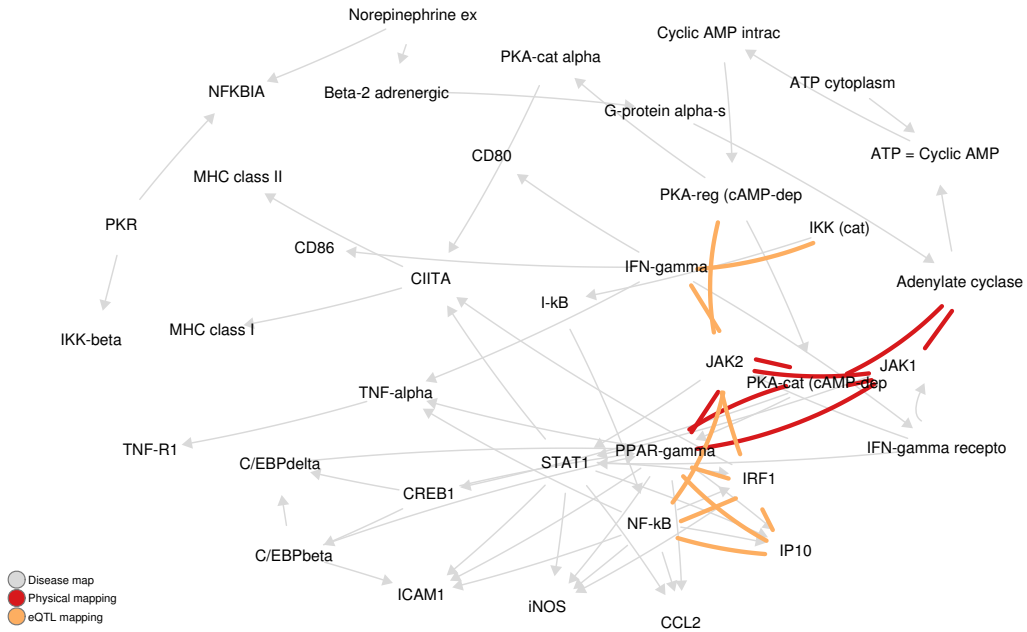

(m) DM 5199: Cooperative action of IFN- $\gamma$  and TNF- $\alpha$  on astrocytes in multiple sclerosis

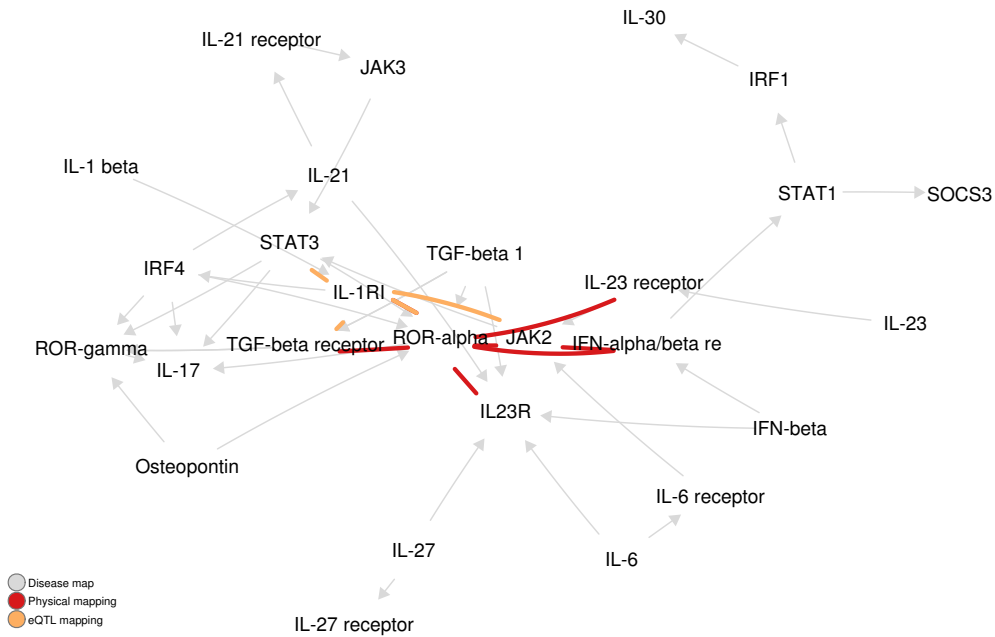

(n) DM 5288: Impaired inhibition of Th17 cell differentiation by IFN- $\beta$  in multiple sclerosis



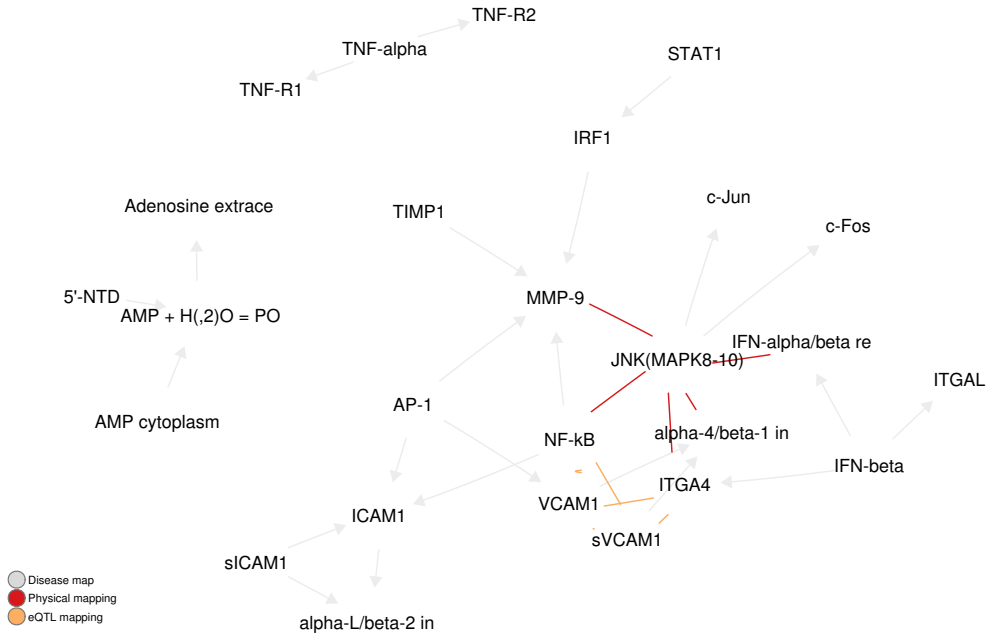

(o) DM 5378: Role of IFN- $\beta$  in the improvement of blood-brain barrier integrity in multiple sclerosis

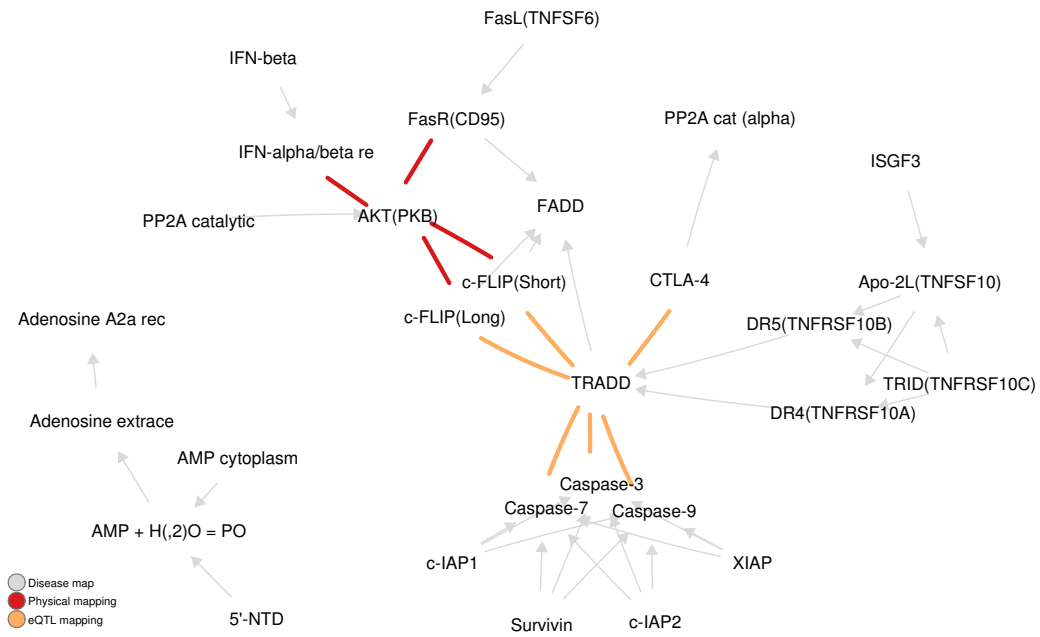

(p) DM 5398: Role of IFN- $\beta$  in activation of T cell apoptosis in multiple sclerosis

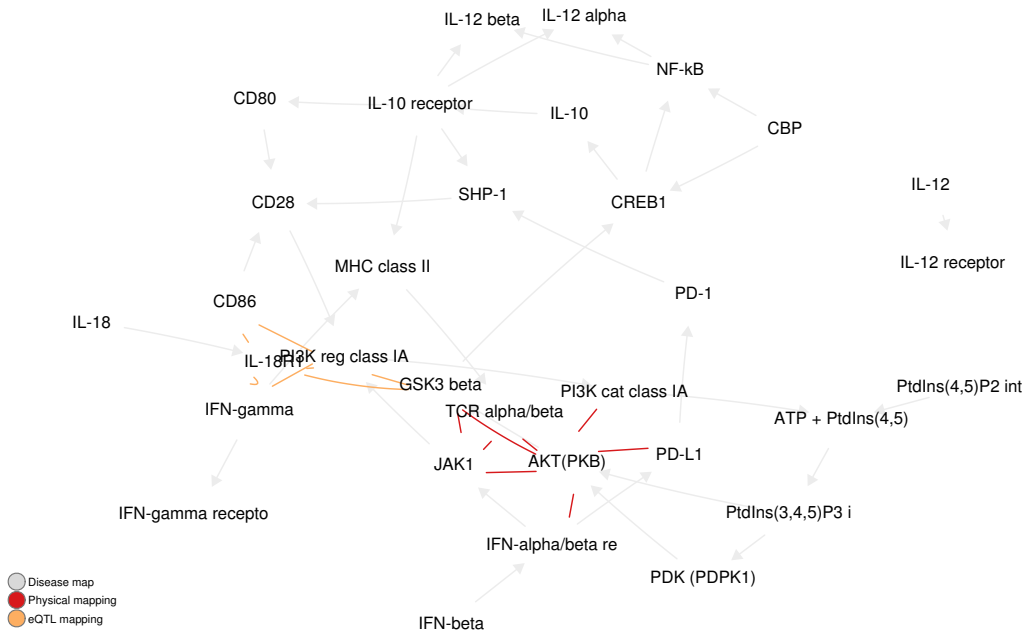

(q) DM 5518: Role of IFN- $\beta$  in inhibition of Th1 cell differentiation in multiple sclerosis

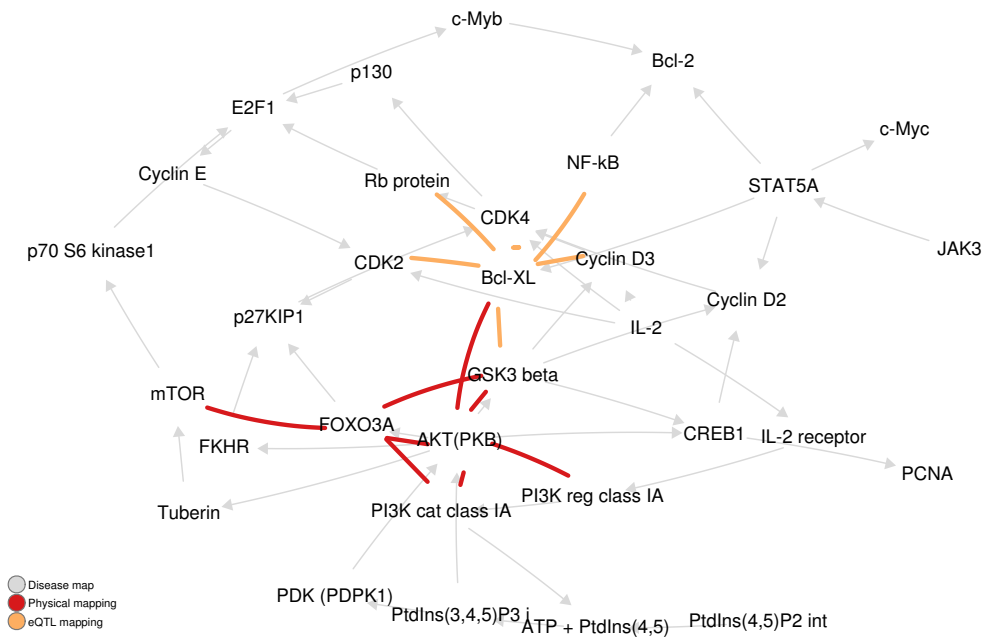

(r) DM 5601: IL-2 as a growth factor for T cells in multiple sclerosis

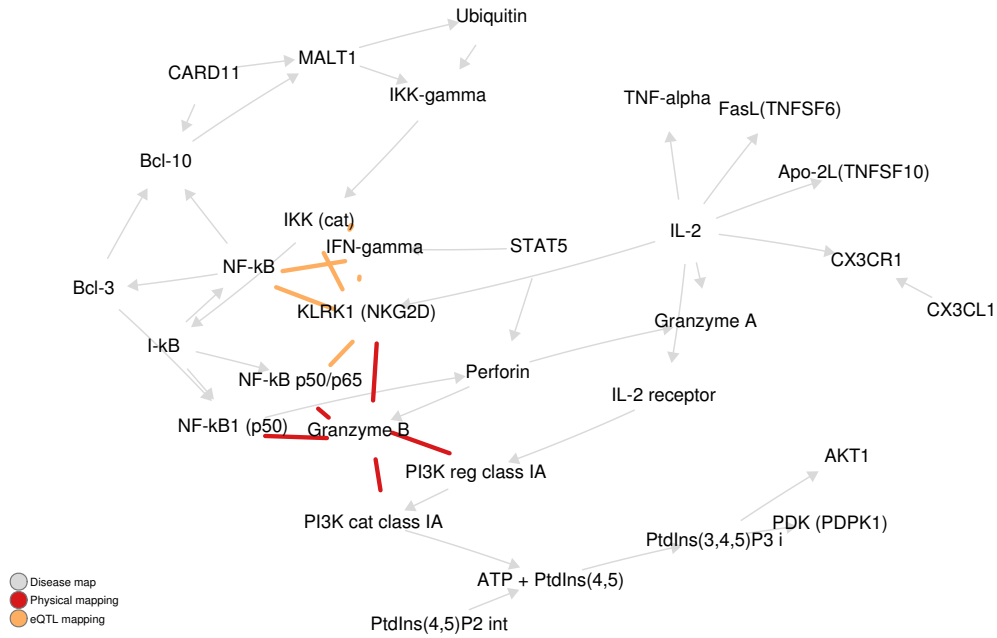

(s) DM 5611: Role of IL-2 in the enhancement of NK cell cytotoxicity in multiple sclerosis

Figure 1: Representation of the 2% top-scoring interactions for physical and eQTL mappings on the original disease maps.

## C Statistical significance of the observed network characteristics

Table 2: Enrichment analysis results for four network characteristics: connectedness, complementarity, centrality and commonality.

| internal ID | Connectedness    |              | Complementariy |            |            | Centrality     | Commonality |         |         |
|-------------|------------------|--------------|----------------|------------|------------|----------------|-------------|---------|---------|
|             | physical mapping | eQTL mapping | 1 vertex       | 2 vertices | 3 vertices | maximal degree | 1 edge      | 2 edges | 3 edges |
| 3302        | 0.019            | 0.021        | 0.705          | 0.254      | 0.038      | 0.147          | 0.542       | 0.149   | 0.022   |
| 3305        | 1.000            | 1.000        | 0.294          | 0.013      | 0.000      | 1.000          | 0.354       | 0.035   | 0.000   |
| 3306        | 0.061            | 0.060        | 0.792          | 0.335      | 0.054      | 0.001          | 0.761       | 0.357   | 0.099   |
| 4455        | 0.000            | 0.000        | 0.988          | 0.905      | 0.679      | 0.000          | 0.822       | 0.499   | 0.224   |
| 4593        | 0.001            | 0.014        | 0.392          | 0.056      | 0.004      | 0.724          | 0.368       | 0.072   | 0.007   |
| 4693        | 0.000            | 0.000        | 0.728          | 0.314      | 0.072      | 0.000          | 0.619       | 0.246   | 0.069   |
| 4703        | 0.000            | 0.000        | 0.649          | 0.208      | 0.033      | 0.750          | 0.479       | 0.126   | 0.020   |
| 4791        | 0.008            | 0.011        | 0.778          | 0.340      | 0.070      | 0.407          | 0.728       | 0.333   | 0.096   |
| 4794        | 0.161            | 1.000        | 0.241          | 0.011      | 0.000      | 1.000          | 0.233       | 0.028   | 0.001   |
| 4843        | 0.000            | 0.000        | 0.836          | 0.477      | 0.171      | 0.014          | 0.551       | 0.179   | 0.037   |
| 4846        | 0.000            | 0.000        | 0.938          | 0.699      | 0.361      | 0.000          | 0.782       | 0.447   | 0.191   |
| 4901        | 0.000            | 0.002        | 0.947          | 0.729      | 0.391      | 0.000          | 0.561       | 0.187   | 0.040   |
| 5199        | 0.000            | 0.000        | 0.726          | 0.291      | 0.057      | 0.134          | 0.785       | 0.439   | 0.183   |
| 5288        | 0.004            | 0.014        | 0.791          | 0.366      | 0.082      | 0.009          | 0.697       | 0.307   | 0.090   |
| 5378        | 0.012            | 0.011        | 0.673          | 0.215      | 0.026      | 0.341          | 0.561       | 0.172   | 0.030   |
| 5398        | 0.012            | 0.004        | 0.779          | 0.346      | 0.074      | 0.052          | 0.567       | 0.178   | 0.034   |
| 5518        | 0.002            | 0.002        | 0.723          | 0.283      | 0.050      | 0.251          | 0.665       | 0.275   | 0.074   |
| 5601        | 0.001            | 0.002        | 0.847          | 0.472      | 0.146      | 0.032          | 0.713       | 0.338   | 0.109   |
| 5611        | 0.004            | 0.004        | 0.687          | 0.245      | 0.037      | 0.405          | 0.602       | 0.210   | 0.048   |

## D Content of resulting subnetworks in therapeutic targets

Table 3: Number of drug targets in the resulting subnetworks for each disease map and its statistical significance.

| internal ID | Number of included drug targets | <i>p</i> -value |
|-------------|---------------------------------|-----------------|
| 3302        | 0                               | 1.000           |
| 3305        | 0                               | 1.000           |
| 3306        | 1                               | 0.378           |
| 4455        | 2                               | 0.380           |
| 4593        | 6                               | 0.009           |
| 4693        | 2                               | 0.382           |
| 4703        | 0                               | 1.000           |
| 4791        | 2                               | 0.154           |
| 4794        | 1                               | 0.222           |
| 4843        | 2                               | 0.808           |
| 4846        | 2                               | 0.500           |
| 4901        | 2                               | 0.265           |
| 5199        | 1                               | 0.875           |
| 5288        | 2                               | 0.728           |
| 5378        | 4                               | 0.024           |
| 5398        | 2                               | 0.347           |
| 5518        | 4                               | 0.275           |
| 5601        | 1                               | 0.768           |
| 5611        | 0                               | 1.000           |

## E MetaCore disease maps

### E.1 Disease map 3305

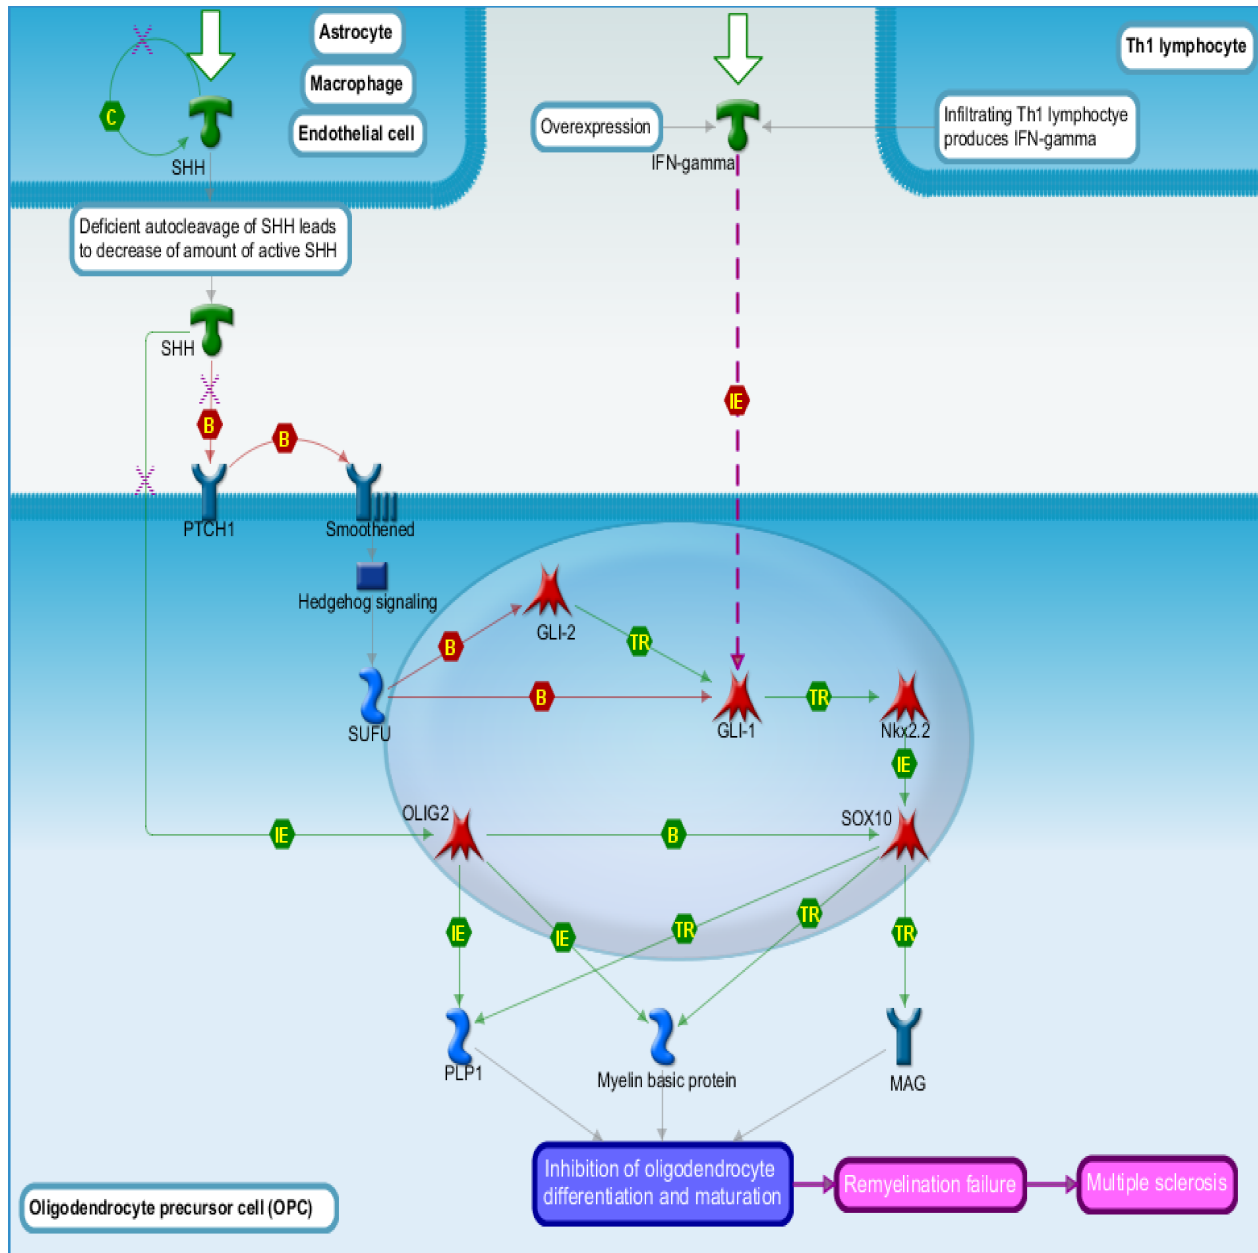

Figure 2: Sonic Hedgehog signaling in oligodendrocyte precursor cells differentiation in multiple sclerosis (DM 3305).

## E.2 Disease map 4455

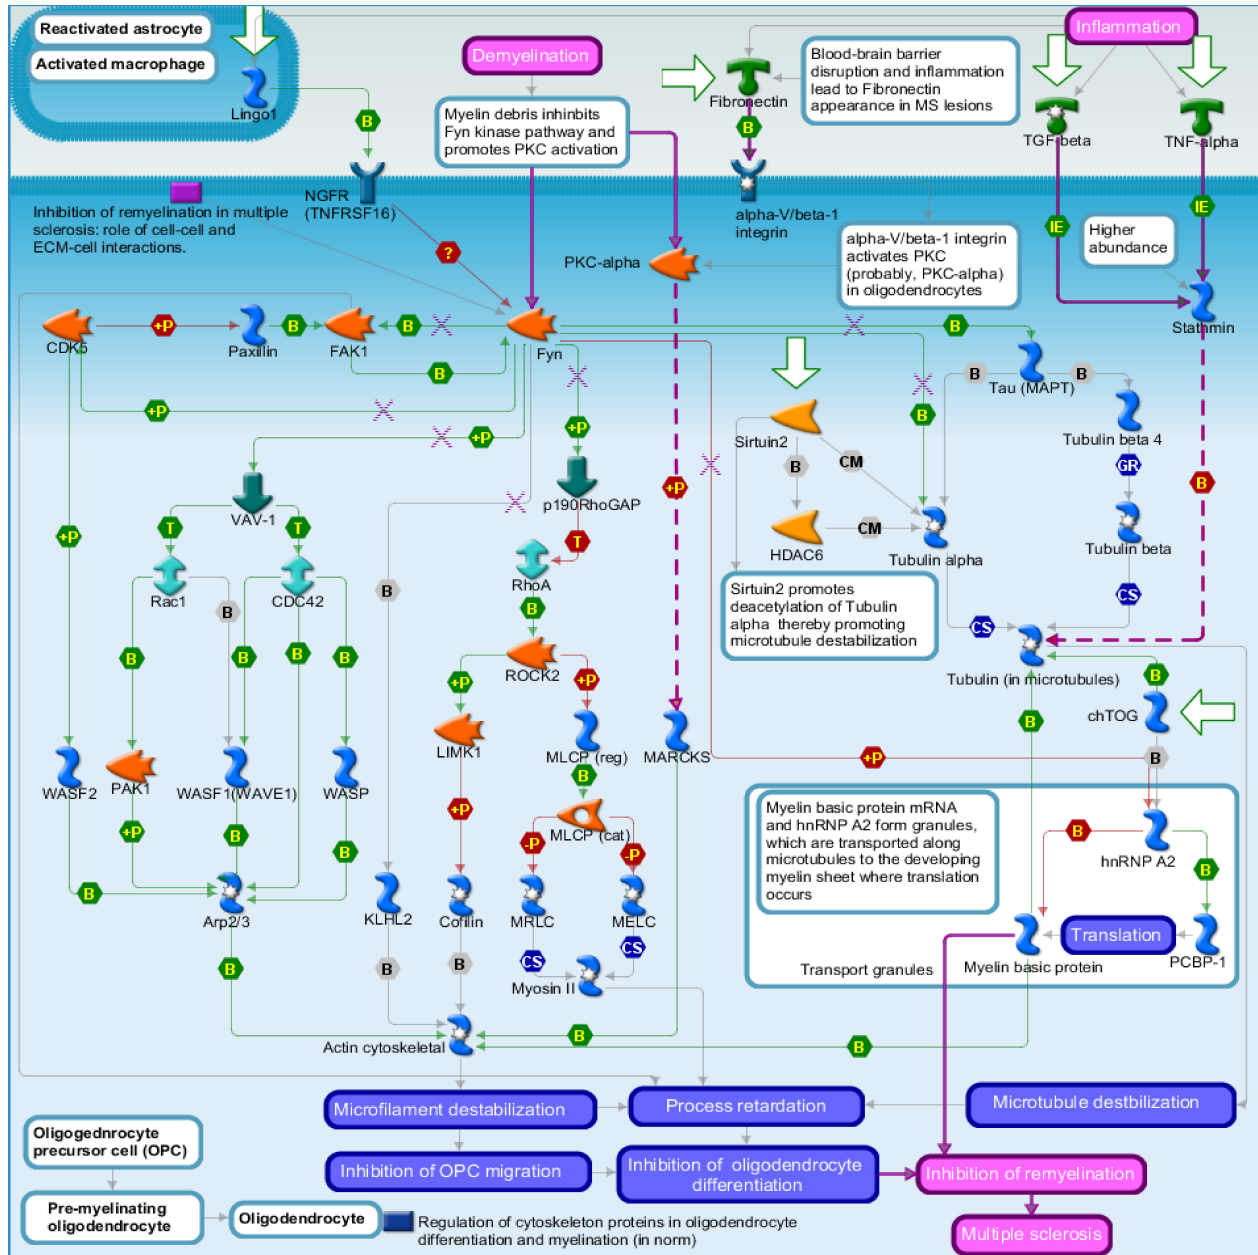

Figure 3: Inhibition of remyelination in multiple sclerosis: regulation of cytoskeleton proteins (DM 4455).

### E.3 Disease map 5199

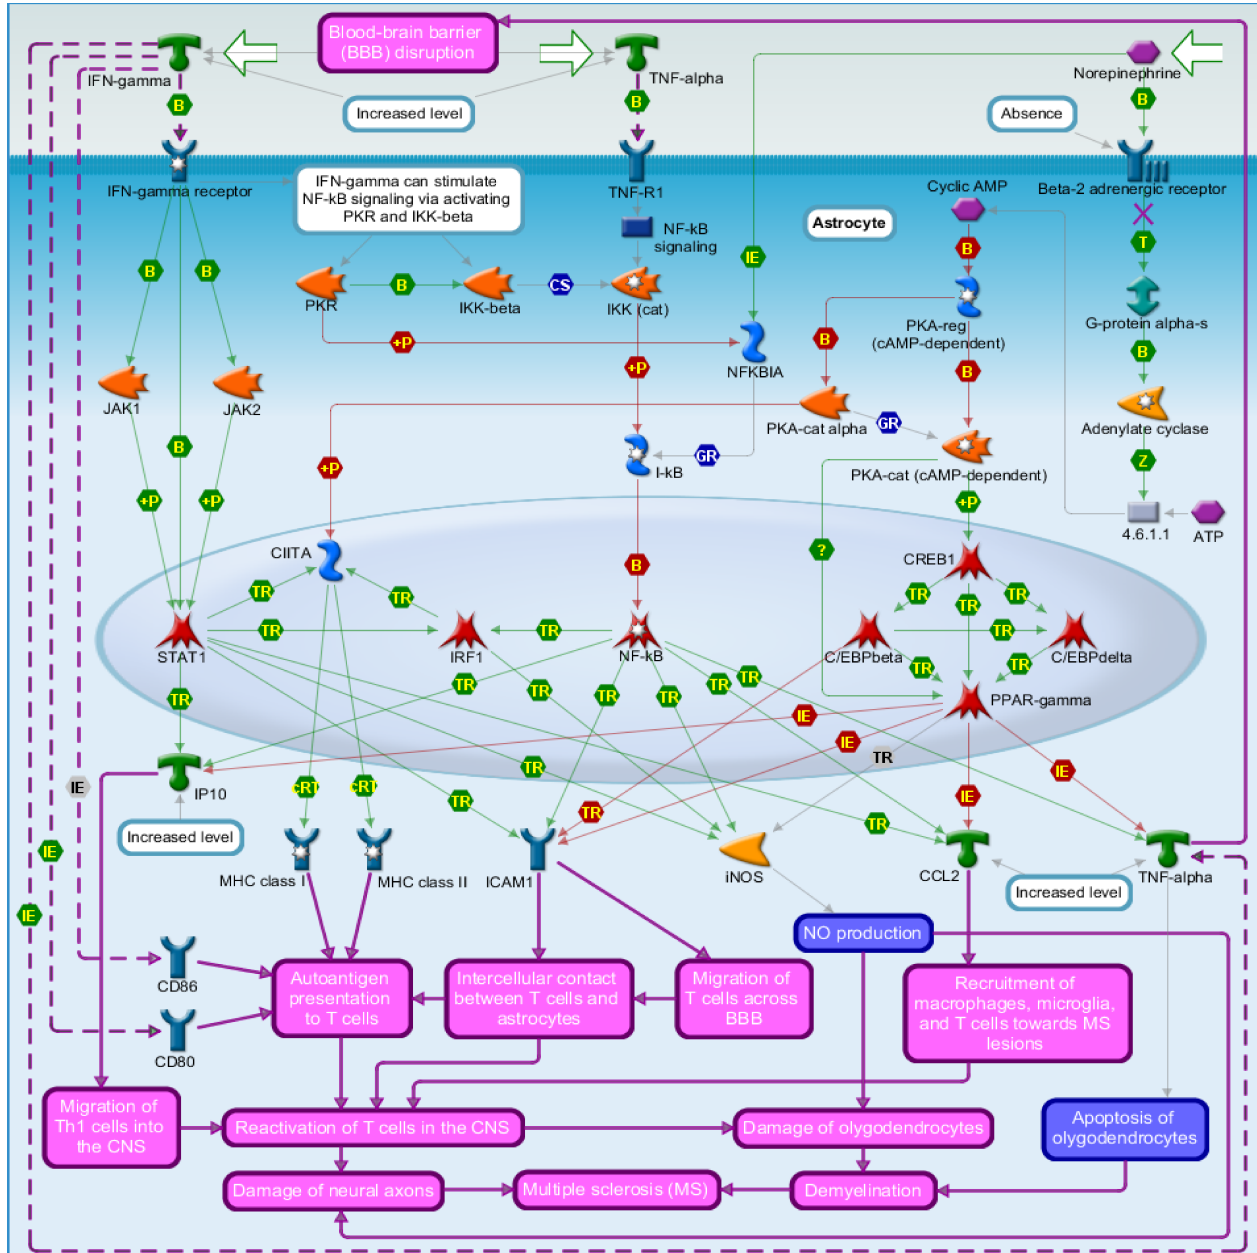

Figure 4: Cooperative action of IFN-gamma and TNF-alpha on astrocytes in multiple sclerosis (DM 5199).



## F Filtering pipeline

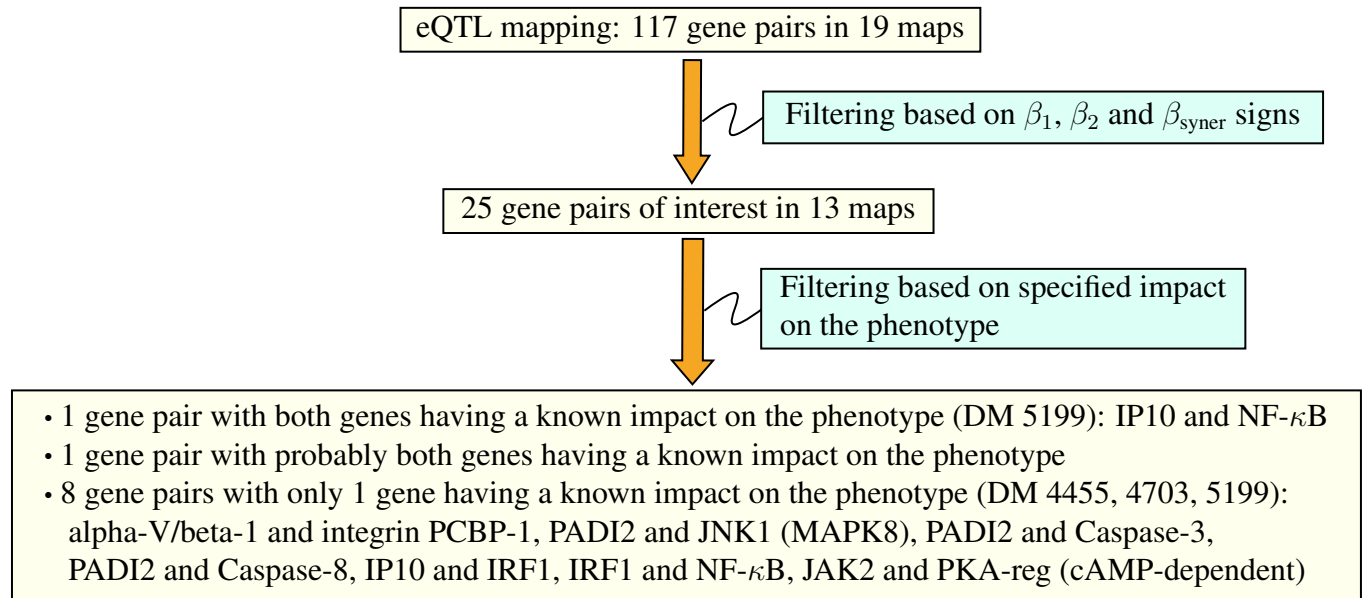

Figure 5: Filtering process for gene pairs identified by eQTL mapping.

## G Physical mapping

Table 4: Pairs of genes identified by physical mapping, and selected on the basis of their SNPs' consequence as a protein dysfunction.

| internal ID | Gene pair                        | Type of interaction                                                           |
|-------------|----------------------------------|-------------------------------------------------------------------------------|
| 3305        | GLI-1 and SUFU                   | direct interaction between the genes, but unspecified impact on MS            |
| 4703        | AKT (PKB) and MEKK1 (MAP3K1)     | no direct interaction between the genes, but AKT has a specified impact on MS |
| 5611        | Granzyme B and KLRK1 (NKG2D)     | no direct interaction between the genes, and unspecified impact on MS         |
|             | Granzyme B and PI3K cat class IA | no direct interaction between the genes, and unspecified impact on MS         |

## H eQTL mapping

Table 5: Compiled results of gene pairs identified by epistasis, and filtered according to the scheme in Fig 2, with their specified or unknown impact on MS.

| internal ID | Title                                                                                                | Interacting gene pair   |              | $\beta_x$ | $\beta_y$ | $\beta_{syner}$ | Specified impact on MS (activation or inhibition) |
|-------------|------------------------------------------------------------------------------------------------------|-------------------------|--------------|-----------|-----------|-----------------|---------------------------------------------------|
| 3302        | Notch signaling in oligodendrocyte precursor cell differentiation in multiple sclerosis              | RBP-J (CBF1)            | kappa ADAM17 | 1.40      | 1.37      | 0.02            | no                                                |
| 3305        | SHH signaling in oligodendrocyte precursor cells differentiation in multiple sclerosis               |                         |              |           |           |                 |                                                   |
| 3306        | Inhibition of oligodendrocyte precursor cells differentiation by Wnt signaling in multiple sclerosis | Beta-catenin            | GSK3 beta    | 1.27      | 1.84      | 0.00            | no                                                |
| 4455        | Inhibition of remyelination in multiple sclerosis: regulation of cytoskeleton proteins               | alpha-V/beta-1 integrin | PCBP-1       | 1.27      | 0.96      | 0.01            | probably yes for alpha-V/beta-1 integrin          |
| 4593        | Axonal degeneration in multiple sclerosis                                                            |                         |              |           |           |                 |                                                   |
| 4693        | Role of Thyroid hormone in regulation of oligodendrocyte differentiation in multiple sclerosis       |                         |              |           |           |                 |                                                   |
| 4703        | Demyelination in multiple sclerosis                                                                  | PADI2                   | JNK1(MAPK8)  | -1.42     | -1.58     | -0.02           | PADI2 enhances in disease                         |
| 4703        | Demyelination in multiple sclerosis                                                                  | PADI2                   | Caspase-3    | -1.56     | -1.96     | -0.01           | PADI2 enhances in disease                         |
| 4703        | Demyelination in multiple sclerosis                                                                  | PADI2                   | Caspase-8    | -1.47     | -1.21     | -0.03           | PADI2 enhances in disease                         |
| 4703        | Demyelination in multiple sclerosis                                                                  | JNK1(MAPK8)             | Caspase-8    | -1.58     | -1.21     | -0.01           | no                                                |
| 4791        | Role of CNTF and LIF in regulation of oligodendrocyte development in multiple sclerosis              | IMPA1                   | STAT3        | 1.41      | 1.10      | 0.02            | no                                                |
| 4791        | Role of CNTF and LIF in regulation of oligodendrocyte development in multiple sclerosis              | PI3K reg class IA       | STAT3        | 1.40      | 1.10      | 0.05            | no                                                |

|      |                                                                                                     |                         |                          |       |       |       |                        |  |
|------|-----------------------------------------------------------------------------------------------------|-------------------------|--------------------------|-------|-------|-------|------------------------|--|
| 4794 | Retinoic acid regulation of oligodendrocyte differentiation in multiple sclerosis                   |                         |                          |       |       |       |                        |  |
| 4843 | Growth factors in regulation of oligodendrocyte precursor cells proliferation in multiple sclerosis | alpha-V/beta-3 integrin | SHP-2                    | 1.34  | 1.97  | 0.07  | no                     |  |
| 4843 | Growth factors in regulation of oligodendrocyte precursor cells proliferation in multiple sclerosis | SHP-2                   | c-Raf-1                  | 1.63  | 1.63  | 0.09  | no                     |  |
| 4846 | Growth factors in regulation of oligodendrocyte precursor cells survival in multiple sclerosis      | ErbB2                   | Neuregulin 1             | 1.10  | 1.58  | 0.11  | no                     |  |
| 4846 | Growth factors in regulation of oligodendrocyte precursor cells survival in multiple sclerosis      | Neuregulin 1            | Bcl-XL                   | -1.49 | -1.17 | -0.02 | no                     |  |
| 4901 | Inhibition of remyelination in multiple sclerosis: role of cell-cell and ECM-cell interactions      | Fyn                     | HYAL3                    | -1.99 | -1.38 | -0.07 | no                     |  |
| 5199 | Cooperative action of IFN- $\gamma$ and TNF- $\alpha$ on astrocytes in multiple sclerosis           | IP10                    | IRF1                     | 1.41  | 1.12  | 0.09  | yes for IP10           |  |
| 5199 | Cooperative action of IFN- $\gamma$ and TNF- $\alpha$ on astrocytes in multiple sclerosis           | IP10                    | NF- $\kappa$ B           | 1.39  | 0.98  | 0.09  | yes for both genes     |  |
| 5199 | Cooperative action of IFN- $\gamma$ and TNF- $\alpha$ on astrocytes in multiple sclerosis           | IRF1                    | NF- $\kappa$ B           | 1.16  | 0.88  | 0.07  | yes for NF- $\kappa$ B |  |
| 5199 | Cooperative action of IFN- $\gamma$ and TNF- $\alpha$ on astrocytes in multiple sclerosis           | JAK2                    | PKA-reg (cAMP-dependent) | 1.14  | 1.25  | 0.02  | yes for JAK2           |  |
| 5288 | Impaired inhibition of Th17 cell differentiation by IFN-beta in multiple sclerosis                  | IL-1RI                  | ROR-alpha                | -1.16 | -1.29 | -0.09 | yes (probable)         |  |
| 5378 | Role of IFN-beta in the improvement of blood-brain barrier integrity in multiple sclerosis          |                         |                          |       |       |       |                        |  |
| 5398 | Role of IFN-beta in activation of T cell apoptosis in multiple sclerosis                            | CTLA-4                  | TRADD                    | -1.61 | -2.61 | -0.04 | no                     |  |
| 5398 | Role of IFN-beta in activation of T cell apoptosis in multiple sclerosis                            | Caspase-3               | TRADD                    | -1.96 | -2.21 | -0.07 | no                     |  |

|      |                                                                                  |                   |                   |       |       |       |    |
|------|----------------------------------------------------------------------------------|-------------------|-------------------|-------|-------|-------|----|
| 5518 | Role of IFN-beta in inhibition of Th1 cell differentiation in multiple sclerosis | IFN- $\gamma$     | PI3K reg class IA | 1.29  | 1.40  | 0.07  | no |
| 5518 | Role of IFN-beta in inhibition of Th1 cell differentiation in multiple sclerosis | GSK3 beta         | IL-18R1           | 1.39  | 1.36  | 0.02  | no |
| 5518 | Role of IFN-beta in inhibition of Th1 cell differentiation in multiple sclerosis | PI3K reg class IA | CD86              | -0.96 | -1.13 | -0.18 | no |
| 5601 | IL-2 as a growth factor for T cells in multiple sclerosis                        | GSK3 beta         | Bcl-XL            | -0.85 | -1.17 | -0.03 | no |
| 5611 | Role of IL-2 in the enhancement of NK cell cytotoxicity in multiple sclerosis    |                   |                   |       |       |       |    |

---
